# Supplementary material for: Clinical Prediction Model for Screening Acute Ischemic Stroke Patients With More Than 10 Cerebral Microbleeds
Source: Front Neurol. 2022 Apr 7;13:833952. doi: 10.3389/fneur.2022.833952 (PMC9021829; doi:10.3389/fneur.2022.833952)
Supplement: Supplementary file 1 [file Table_1.XLS]

## Sheet: Development cohort
	Sex	Age	Drinking	Hypertension	Stroke	Diabetes	Coronary heart disease	Leukoaraiosis	Brain atrophy	Lacune	CPM	>10 CMBs
1	1	41	0	1	1	0	0	0	0	0	1	0
2	1	71	1	1	0	0	0	0	0	0	1	0
3	0	50	0	1	0	0	0	0	0	0	1	0
4	0	53	0	1	0	0	0	0	0	0	1	0
5	1	61	1	0	0	0	0	0	0	0	0	0
6	1	64	1	1	0	0	0	0	0	0	1	0
7	1	76	1	1	0	0	0	0	0	0	1	0
8	1	56	1	1	0	0	0	0	0	0	1	0
9	0	71	0	1	0	1	0	0	0	0	1	0
10	0	55	0	1	0	0	0	0	0	0	1	0
11	1	68	1	0	1	0	0	0	0	0	0	0
12	1	34	1	1	0	0	0	0	0	0	1	0
13	1	63	0	0	1	0	0	0	0	0	0	0
14	1	67	0	1	0	0	0	0	0	0	1	0
15	1	53	1	1	0	0	0	0	0	1	2	0
16	1	51	0	1	0	0	0	0	0	1	2	0
17	1	55	0	1	1	0	0	0	0	1	2	0
18	0	68	0	0	1	1	0	0	0	1	1	0
19	0	59	0	0	0	0	0	0	0	0	0	0
20	0	57	0	1	0	0	0	0	0	2	3	0
21	1	70	1	0	0	0	0	0	0	0	0	0
22	1	81	1	0	1	0	0	0	0	2	2	0
23	1	40	0	1	0	1	0	0	0	1	2	0
24	0	73	0	1	1	0	0	0	0	0	1	0
25	1	70	0	1	0	0	1	0	0	1	2	0
26	1	35	0	0	0	0	0	0	0	2	2	0
27	1	77	1	0	1	1	0	0	1	1	3	0
28	1	66	0	1	1	0	1	1	0	0	3	0
29	1	47	0	1	0	0	0	0	0	1	2	0
30	1	59	1	1	0	1	0	1	1	2	7	0
31	1	80	1	1	0	0	0	1	2	1	9	0
32	1	79	0	1	0	1	1	2	0	1	6	0
33	0	61	0	0	0	0	0	0	0	0	0	0
34	1	62	1	0	0	0	0	0	0	0	0	0
35	1	65	0	1	0	0	0	0	0	0	1	0
36	1	42	1	1	0	0	0	0	0	0	1	0
37	1	60	0	1	0	0	0	0	0	0	1	0
38	1	63	1	0	1	1	0	0	0	0	0	0
39	1	55	1	0	0	0	0	0	0	0	0	0
40	0	53	0	1	0	0	0	0	0	0	1	0
41	1	67	1	0	0	0	0	0	0	0	0	0
42	1	51	1	1	1	0	0	0	0	0	1	0
43	1	78	1	1	0	1	1	0	0	0	1	0
44	1	67	0	1	1	0	0	0	0	0	1	0
45	1	61	1	0	0	0	0	0	0	1	1	0
46	1	72	0	1	0	1	0	0	0	1	2	0
47	1	61	1	0	1	0	0	0	0	2	2	0
48	1	61	0	1	1	0	0	0	0	0	1	0
49	0	56	0	1	0	1	0	0	0	0	1	0
50	0	69	0	0	0	0	1	0	0	1	1	0
51	1	58	1	1	1	0	0	0	0	1	2	0
52	0	61	0	1	0	1	0	0	1	1	4	0
53	1	65	1	1	0	0	0	1	0	0	3	0
54	0	74	0	1	0	0	0	1	0	1	4	0
55	1	62	0	1	1	0	0	0	0	1	2	0
56	1	58	1	1	1	1	0	0	0	2	3	0
57	1	63	1	0	0	1	0	0	0	0	0	0
58	1	86	1	0	0	0	0	2	0	1	5	0
59	1	69	0	1	0	1	0	1	1	0	5	0
60	0	68	0	1	1	0	0	1	0	2	5	0
61	1	49	1	1	1	0	0	0	0	0	1	0
62	0	67	0	1	1	0	1	0	0	0	1	0
63	0	31	0	0	0	0	0	0	0	0	0	0
64	0	73	0	0	0	0	1	0	0	0	0	0
65	0	41	0	0	0	0	0	0	0	0	0	0
66	1	41	1	0	0	0	0	0	0	0	0	0
67	1	43	1	1	0	0	0	0	0	0	1	0
68	0	68	0	1	1	0	0	0	0	0	1	0
69	1	64	1	1	1	1	0	0	0	0	1	0
70	1	54	0	1	0	0	0	0	0	0	1	0
71	1	68	1	1	0	1	0	0	0	0	1	0
72	1	57	1	1	1	0	0	0	0	0	1	0
73	0	71	0	1	0	0	1	0	0	0	1	0
74	1	61	0	0	0	0	0	0	0	0	0	0
75	1	64	1	1	1	0	0	0	0	1	2	0
76	1	48	1	1	0	0	0	0	0	0	1	0
77	1	67	1	0	0	0	0	0	0	1	1	0
78	1	57	0	1	0	0	0	0	0	2	3	0
79	0	67	0	1	1	0	0	0	0	0	1	0
80	1	73	1	1	0	0	1	0	0	2	3	0
81	1	75	1	0	0	0	0	0	0	0	0	0
82	0	65	0	1	1	0	0	1	0	1	4	0
83	0	77	0	1	1	0	1	1	0	0	3	0
84	0	66	0	1	0	0	0	2	1	1	8	0
85	1	56	1	1	0	1	1	0	0	0	1	0
86	1	54	0	0	0	0	1	0	0	0	0	0
87	1	43	0	1	1	0	0	0	0	0	1	0
88	1	40	1	1	0	0	0	0	0	0	1	0
89	0	56	0	1	0	1	0	0	0	0	1	0
90	1	69	0	1	0	0	0	0	1	0	3	0
91	0	71	0	1	0	0	1	0	0	0	1	0
92	1	61	1	1	1	1	0	0	0	0	1	0
93	1	48	0	1	0	0	0	0	0	0	1	0
94	1	55	0	1	1	0	0	0	1	1	4	0
95	1	56	1	0	0	0	0	0	0	2	2	0
96	0	66	0	1	0	1	0	0	0	0	1	0
97	1	62	0	1	0	0	0	0	1	1	4	0
98	1	65	1	1	0	1	1	0	0	0	1	0
99	1	56	1	0	0	0	0	0	0	0	0	0
100	0	59	0	1	0	0	1	0	0	0	1	0
101	1	54	0	0	1	0	0	0	0	0	0	0
102	1	53	1	1	0	0	0	0	0	0	2	0
103	1	51	1	1	1	1	0	0	0	1	2	0
104	0	46	0	1	1	0	0	0	0	0	1	0
105	1	81	1	0	0	0	0	0	0	0	0	0
106	1	63	0	1	1	1	0	0	1	2	5	0
107	1	75	1	1	0	0	0	1	0	1	4	0
108	1	53	0	0	0	0	0	0	0	1	1	0
109	1	55	1	1	0	0	0	0	0	0	1	0
110	1	56	0	1	1	0	1	0	0	2	3	0
111	1	54	1	0	1	0	0	0	0	1	1	0
112	0	49	0	1	0	1	1	0	0	0	1	0
113	1	81	0	1	0	0	0	0	1	1	4	0
114	1	53	0	1	0	0	0	0	0	1	2	0
115	1	57	0	0	0	0	0	1	0	1	3	0
116	1	73	0	0	1	0	0	1	0	2	4	0
117	1	73	0	1	0	0	0	1	1	2	7	0
118	1	51	0	1	0	0	0	0	0	0	1	0
119	1	79	1	1	1	0	0	1	1	1	6	0
120	1	57	0	0	0	0	0	0	0	1	1	0
121	1	60	0	1	1	0	1	0	0	0	1	0
122	1	66	0	0	1	0	1	0	1	0	2	0
123	0	64	0	1	0	1	0	0	1	0	3	0
124	1	73	1	0	0	0	0	0	0	1	1	0
125	1	49	0	0	0	0	0	2	0	1	1	0
126	1	64	1	0	1	0	0	2	1	2	8	0
127	0	49	0	1	0	0	1	0	0	0	1	0
128	1	44	0	1	0	0	0	0	0	0	1	0
129	1	55	0	1	0	0	0	0	1	2	5	0
130	1	69	1	0	0	0	0	1	0	1	3	0
131	1	60	1	1	1	0	0	2	1	2	9	0
132	1	44	0	1	0	0	0	0	1	1	4	0
133	1	78	0	1	1	0	0	1	1	0	5	0
134	1	82	0	1	1	0	1	2	2	1	11	1
135	1	57	0	1	1	0	0	1	2	1	9	1
136	0	70	1	1	0	0	0	1	1	2	7	1
137	0	70	0	1	0	0	0	1	1	2	7	1
138	1	78	1	0	1	0	0	2	1	2	8	1
139	1	76	0	1	0	1	0	0	2	0	6	1
140	1	67	0	1	1	0	1	0	2	0	6	1
141	1	61	1	1	0	0	1	0	2	1	7	1
142	1	56	0	1	0	0	0	0	2	1	7	1
143	0	61	0	1	1	0	0	1	2	0	8	1
144	0	59	0	1	0	0	1	1	1	2	7	1
145	1	70	0	1	0	0	1	0	1	1	4	1
146	1	67	0	1	1	0	0	1	0	2	5	1
147	1	69	1	1	0	0	0	0	0	2	5	1
148	1	63	0	1	1	1	0	0	0	0	1	1
149	0	69	0	0	0	0	0	2	0	2	6	1
150	0	70	0	1	1	0	0	0	2	1	7	1
151	1	55	1	1	1	1	0	2	2	2	12	1
152	0	71	0	1	0	0	0	1	1	1	6	1
153	1	68	1	0	0	0	0	1	2	2	9	1
154	1	78	0	1	0	0	0	1	2	1	9	1
155	0	59	0	0	0	0	0	0	0	0	0	1
156	1	48	1	1	1	0	0	0	0	0	1	1
157	1	57	0	1	1	1	0	1	1	1	6	1
158	1	72	0	1	0	0	0	0	1	2	5	1
159	1	51	1	1	0	0	0	1	1	2	7	1
160	0	52	0	0	0	0	0	1	0	2	4	1
161	1	62	0	0	0	0	0	0	2	1	6	1
162	0	67	0	1	0	0	0	2	1	0	7	1
163	0	52	0	1	0	0	0	1	1	2	7	1
164	1	66	0	0	0	0	0	2	2	2	11	1
165	0	51	0	0	0	0	0	1	1	2	6	1
166	1	67	0	1	0	0	0	1	2	2	10	1
167	1	67	0	1	1	1	0	1	2	2	10	1
168	1	63	0	0	0	0	0	0	1	1	3	1
169	1	50	1	1	0	1	0	0	0	0	1	1
170	1	48	1	1	0	0	0	0	0	0	1	1
171	0	66	0	1	1	1	0	0	0	1	2	1
172	0	84	0	0	0	0	0	0	2	0	5	1
173	0	82	0	1	0	1	1	1	2	1	9	1
174	1	76	1	1	0	0	0	1	0	2	5	1
175	1	51	0	1	0	0	0	1	0	2	5	1
176	0	67	0	1	0	1	0	0	0	1	2	1
177	1	77	0	1	1	0	0	1	2	2	10	1
178	0	65	0	1	1	0	0	2	2	1	11	1
179	0	80	0	1	0	0	1	1	1	2	7	1
180	1	74	1	1	1	0	0	0	0	0	1	1
181	1	68	0	0	0	0	0	2	2	2	11	1
182	1	80	0	1	0	0	0	0	2	0	6	1
183	1	65	1	0	0	0	0	1	2	2	9	1
184	0	60	0	1	0	0	0	1	0	1	4	1
185	1	72	1	0	0	0	0	1	1	1	5	1
186	0	66	0	1	1	1	0	1	2	2	10	1
187	0	53	0	1	0	1	0	0	2	0	6	1
188	1	64	1	1	0	1	0	0	0	1	2	1
189	1	69	0	1	0	0	0	0	1	0	3	1
190	1	69	0	0	1	0	0	2	2	2	11	1
191	0	55	0	0	0	0	0	0	0	0	0	1
192	0	46	0	1	0	1	0	0	0	0	1	1
193	1	62	0	1	0	0	0	2	1	1	8	1
194	1	41	0	1	1	1	0	0	2	2	8	1
195	1	76	0	0	0	0	0	1	1	2	6	1
196	1	67	0	1	0	0	0	2	2	2	12	1
197	1	78	1	1	0	1	0	2	1	2	9	1
198	0	84	0	1	0	1	0	2	2	2	12	1
199	1	68	0	1	1	0	0	1	2	2	10	1
200	1	78	1	1	0	0	0	2	1	2	9	1
201	1	79	1	1	1	0	0	1	2	1	9	1
202	0	56	0	1	0	0	0	1	1	1	6	1
203	0	57	0	1	0	1	0	1	0	2	5	1
204	0	70	0	1	0	0	0	2	2	2	12	1
205	1	57	0	1	0	1	0	1	2	1	9	1
206	1	55	0	1	1	0	0	0	2	2	8	1
207	1	65	0	1	0	1	0	1	1	2	7	1
208	1	56	1	1	1	0	0	1	2	2	10	1
209	1	79	1	0	0	0	0	0	2	0	5	1
210	0	63	0	1	0	0	0	2	2	1	11	1
211	0	58	0	1	1	0	0	0	2	2	8	1
212	1	73	0	1	0	0	0	2	1	1	8	1
213	0	66	0	1	0	0	0	0	0	0	1	1
214	0	63	0	1	0	0	0	0	2	1	7	1
215	1	69	0	1	0	0	0	1	2	2	10	1
216	1	65	1	0	0	0	0	1	2	2	9	1
217	1	55	0	1	0	0	0	1	2	0	8	1
218	0	61	0	1	1	0	0	0	2	0	6	1
219	1	67	0	1	0	1	0	2	1	2	9	1
220	1	57	1	1	1	0	0	1	1	2	7	1
221	1	55	0	1	0	0	0	0	2	0	6	1
222	0	83	0	1	0	0	0	0	2	0	6	1
223	1	67	0	0	1	1	0	1	2	1	8	1
224	1	56	0	1	0	0	0	0	1	2	5	1
225	1	65	0	1	0	0	0	1	2	2	10	1
226	1	46	1	1	0	1	0	1	1	1	6	1
227	1	64	1	1	1	0	0	0	2	1	7	1
228	1	70	1	1	0	0	0	1	2	0	8	1
229	1	72	0	1	1	0	0	0	1	0	3	1
230	0	77	0	1	0	0	1	2	2	1	11	1
231	1	49	0	1	0	0	0	0	2	0	6	1
232	1	55	1	1	1	1	0	0	1	2	5	1
233	1	68	0	0	0	0	0	1	2	0	7	1
234	1	55	1	0	0	0	0	0	2	2	7	1
235	1	70	1	1	0	0	0	1	2	0	8	1
236	1	65	0	1	1	0	0	1	2	1	9	1
237	1	82	0	1	0	0	0	1	1	2	7	1
238	0	71	1	1	0	0	0	0	2	0	6	1
239	1	63	0	1	0	0	0	2	1	0	7	1
240	1	66	0	1	0	1	0	2	2	1	11	1
241	0	66	0	1	0	0	0	0	2	1	7	1
242	1	64	0	1	0	1	0	0	2	1	7	1
243	1	74	1	1	0	0	0	2	1	2	9	1
244	1	51	0	1	0	0	0	0	2	1	7	1
245	1	56	0	1	0	0	0	2	2	1	11	1
246	1	52	1	1	0	0	0	2	0	0	5	1
247	0	75	0	1	0	0	0	2	2	1	11	1
248	1	49	0	1	1	0	0	2	2	2	12	1
249	1	74	1	1	1	1	1	2	2	2	12	1
250	1	72	0	1	0	1	0	1	2	1	9	1
251	1	71	0	1	0	0	1	1	2	2	10	1
252	0	40	1	1	1	0	0	2	1	1	8	1
253	1	38	0	1	0	0	0	1	2	1	9	1
254	1	79	1	1	0	0	0	2	1	1	8	1
255	0	70	0	1	0	1	0	0	2	1	7	1
256	1	66	0	1	1	0	1	0	2	0	6	1
257	1	57	0	1	0	0	0	0	1	0	3	1
258	0	58	1	1	1	0	0	2	1	0	7	1
259	0	83	0	0	0	0	0	0	2	1	6	1
260	1	69	0	1	1	1	0	1	1	1	6	1
261	1	68	1	1	0	0	0	1	2	2	10	1
262	1	64	1	0	0	0	0	1	2	1	9	1
263	1	68	0	1	0	0	0	0	2	1	7	1
264	1	67	1	1	1	0	1	1	2	1	9	1
265	1	55	0	1	0	0	0	0	2	0	1	1
266	1	58	0	0	0	1	0	0	0	1	1	1
267	0	60	1	1	0	0	0	1	2	2	10	1
268	1	60	0	1	1	0	0	2	1	2	9	1
269	1	57	0	1	1	0	0	1	0	2	5	1
270	1	56	0	1	0	0	0	2	2	2	12	1
271	1	65	1	1	1	0	0	0	2	1	7	1
272	1	52	1	1	0	0	0	2	2	0	10	1
273	0	49	1	1	1	0	0	2	2	1	11	1
274	1	73	0	1	1	0	1	2	1	1	8	1
275	1	70	0	1	0	0	0	2	0	1	6	1
276	1	61	0	1	0	0	0	0	0	1	2	1
277	1	69	1	1	1	0	1	2	2	1	11	1
278	0	64	0	1	0	0	0	2	1	0	7	1
279	1	32	0	1	0	0	0	0	0	2	3	1
280	1	48	1	1	1	0	1	0	0	0	1	1
281	1	73	0	1	0	0	0	2	2	1	11	1
282	0	51	1	1	0	0	0	2	0	1	6	1
283	0	71	0	0	0	0	0	2	2	0	9	1
284	1	57	0	1	1	0	0	1	2	2	10	1
285	1	62	1	1	0	0	0	0	0	1	2	1
286	1	77	1	0	0	0	0	0	1	0	2	1
287	0	64	0	1	1	0	1	2	2	2	12	1
288	1	45	0	1	0	0	1	0	2	2	8	1
289	1	64	1	1	1	0	0	2	2	2	12	1
290	1	42	0	1	1	1	0	2	2	1	11	1
291	1	57	1	0	0	0	0	0	0	0	0	1
292	1	75	0	1	0	1	1	2	1	2	9	1
293	0	52	0	0	0	0	0	0	0	0	0	0
294	0	39	0	0	0	0	0	0	0	0	0	0
295	0	55	0	1	0	0	0	0	0	0	1	0
296	1	60	1	0	0	0	0	0	0	1	1	0
297	0	72	0	1	0	0	0	0	0	0	1	0
298	0	56	0	0	1	0	0	0	0	1	1	0
299	1	59	0	0	0	0	0	0	0	0	0	0
300	1	49	1	0	0	0	0	0	0	0	0	0
301	0	85	0	1	0	0	1	0	0	0	1	0
302	0	45	0	1	1	0	0	0	1	0	3	0
303	0	71	0	0	0	0	0	0	0	0	0	0
304	1	60	0	1	0	0	0	0	0	0	1	0
305	1	66	0	0	0	0	0	1	2	1	8	1
306	1	35	0	1	1	1	0	0	0	0	1	0
307	1	75	0	1	0	0	1	0	0	0	1	0
308	1	49	1	1	1	0	0	0	0	0	1	0
309	1	42	0	1	0	0	0	0	2	0	6	0
310	0	60	0	0	0	0	0	0	2	0	5	0
311	1	57	0	1	1	0	0	0	0	0	1	0
312	1	61	0	1	1	0	0	0	1	0	3	0
313	0	82	0	1	0	0	0	0	0	0	1	0
314	1	76	0	1	1	0	0	1	1	2	7	1
315	1	70	1	1	1	0	0	0	1	0	3	0
316	0	54	0	1	1	0	0	0	2	0	6	0
317	1	71	0	1	1	0	0	0	1	0	3	0
318	1	81	0	0	0	0	0	0	0	1	1	1
319	1	60	1	1	1	0	0	1	2	0	8	0
320	0	45	0	0	0	0	0	1	0	2	4	1
321	1	42	0	0	0	1	0	1	0	1	3	1
322	1	65	1	1	1	0	0	1	0	2	5	1
323	0	65	0	1	1	1	1	1	0	1	4	1
324	0	64	0	1	1	1	0	0	0	0	1	0
325	1	53	0	1	0	0	0	0	0	0	1	0
326	1	70	1	1	0	0	0	1	2	2	10	1
327	0	67	0	1	0	1	0	0	0	0	1	0
328	1	54	0	1	1	0	0	0	2	0	6	0
329	1	65	0	0	0	0	0	0	0	0	0	0
330	1	78	0	1	0	0	0	0	0	0	1	0
331	1	63	1	1	1	0	0	0	0	0	1	0
332	1	77	0	0	1	0	0	0	0	0	0	0
333	1	57	0	0	0	0	0	0	0	0	0	0
334	1	45	0	1	0	0	0	0	0	0	1	0
335	1	77	0	0	1	0	0	0	0	0	0	0
336	0	57	0	0	0	0	0	0	0	0	0	0
337	1	45	1	1	0	0	0	0	0	0	1	0
338	1	68	0	0	1	0	0	0	0	0	0	0
339	0	63	0	0	0	0	0	0	0	0	0	0
340	1	41	1	1	0	0	0	0	0	0	1	0
341	0	72	0	1	1	0	1	0	0	0	1	0
342	1	68	0	1	1	0	0	0	0	0	1	0
343	0	63	0	1	0	0	0	0	0	0	1	0
344	1	41	0	1	1	0	0	0	0	0	1	0
345	1	71	0	1	0	0	0	0	0	0	1	0
346	0	50	0	1	0	0	0	0	0	0	1	0
347	1	57	0	1	0	0	0	0	0	0	1	0
348	0	53	0	1	0	0	0	0	0	0	1	0
349	1	61	0	0	0	0	0	0	0	0	0	0
350	1	64	0	1	0	0	0	0	0	0	1	0
351	1	76	0	1	0	0	0	0	0	0	1	0
352	1	56	0	1	0	0	0	0	0	0	1	0
353	0	71	0	1	0	1	0	0	0	0	1	0
354	0	55	0	1	0	0	0	0	0	0	1	0
355	1	68	0	0	1	0	0	0	0	0	0	0
356	1	34	0	1	0	0	0	0	0	0	1	0
357	1	63	0	0	1	0	0	0	0	0	0	0
358	1	67	0	1	0	0	0	0	0	1	2	0
359	1	53	0	1	0	0	0	0	0	0	1	0
360	1	51	1	1	0	1	0	0	0	1	2	0
361	1	55	0	1	1	0	0	0	0	1	2	0
362	0	68	0	0	1	1	0	0	0	1	1	0
363	1	70	0	1	0	0	0	0	0	0	1	0
364	1	67	0	0	0	0	0	0	0	0	0	0
365	1	59	0	1	0	0	1	0	0	0	1	0
366	0	62	0	1	0	0	0	0	0	0	1	0
367	1	72	1	0	0	1	0	0	0	0	0	0
368	0	59	0	0	0	0	0	0	0	0	0	0
369	1	63	0	1	1	1	0	0	0	0	1	0
370	0	57	0	1	0	0	0	0	0	2	3	0
371	1	70	0	0	0	0	0	0	0	0	0	0
372	1	81	0	0	1	0	0	0	0	2	2	0
373	1	40	1	1	0	1	0	0	0	1	2	0
374	0	73	0	1	1	0	1	0	0	0	1	0
375	1	70	1	1	0	0	0	0	0	1	2	0
376	1	35	0	0	0	0	0	0	0	1	1	0
377	1	66	1	1	1	0	0	0	0	2	3	0
378	1	77	0	0	1	1	0	0	2	1	6	0
379	1	66	1	1	1	0	1	1	0	0	3	0
380	1	47	1	1	0	1	0	0	0	1	2	0
381	1	59	0	1	0	0	0	1	2	2	10	0
382	1	80	0	1	0	1	0	1	2	1	9	0
383	1	79	0	1	0	0	1	2	0	1	6	0
384	0	61	0	0	0	1	0	0	0	0	0	0
385	1	62	1	0	0	0	0	0	0	0	0	0
386	1	54	1	1	0	0	0	0	0	0	1	0
387	0	49	0	0	0	0	0	0	0	0	0	0
388	1	42	0	1	0	0	0	0	0	0	1	0
389	1	60	1	0	1	0	0	0	0	0	0	0
390	1	65	0	1	0	0	0	0	0	0	1	0
391	1	42	0	1	0	0	0	0	2	0	6	0
392	1	60	0	1	0	0	0	0	0	0	1	0
393	1	63	0	0	1	1	0	0	0	0	0	0
394	1	55	0	0	0	0	0	0	0	0	0	0
395	1	50	0	1	0	0	0	0	0	0	1	0
396	0	53	0	1	0	0	0	0	0	0	1	0
397	1	67	0	0	0	0	0	0	0	0	0	0
398	1	51	0	1	1	0	0	0	0	0	1	0
399	0	56	0	1	0	1	0	0	0	1	2	0
400	0	77	0	1	0	0	0	0	0	0	1	0
401	0	79	0	1	1	0	1	0	0	0	1	0
402	0	68	0	1	1	0	1	0	0	0	1	0
403	1	54	1	0	0	0	1	0	0	0	0	0
404	0	66	0	0	0	0	0	0	0	0	0	0
405	1	76	0	1	0	0	1	0	0	1	2	0
406	1	57	0	1	0	0	0	0	0	1	2	0
407	1	78	0	1	0	1	1	0	0	0	1	0
408	1	67	0	1	1	0	1	0	0	0	1	0
409	1	61	0	0	0	0	0	0	0	1	1	0
410	1	72	1	1	0	1	0	0	0	0	1	0
411	1	61	0	0	1	0	0	0	0	1	1	0
412	1	64	0	0	0	0	0	0	1	1	3	0
413	1	61	0	1	1	0	0	0	0	0	1	0
414	1	70	1	1	0	1	0	0	0	0	1	0
415	0	64	0	1	0	1	1	0	0	0	1	0
416	1	65	0	1	0	0	1	0	0	0	1	0
417	0	60	0	1	0	0	0	0	0	0	1	0
418	0	56	0	1	0	1	0	0	0	0	1	0
419	0	69	0	0	0	0	1	0	0	1	1	0
420	1	58	0	1	1	0	0	0	0	1	2	0
421	0	61	0	1	0	1	0	0	1	1	4	0
422	1	65	1	1	0	0	0	1	0	1	2	0
423	0	74	0	1	0	1	0	1	0	1	4	0
424	1	56	0	1	1	0	0	0	0	1	2	0
425	1	62	0	1	1	1	0	0	0	2	3	0
426	1	62	0	1	0	0	0	0	1	0	3	0
427	1	68	1	0	0	0	1	0	2	0	5	0
428	0	86	0	1	0	0	0	2	0	1	6	0
429	0	63	0	1	0	0	0	0	0	0	1	0
430	1	73	0	1	0	0	1	0	2	1	7	0
431	1	48	0	1	1	0	0	0	0	0	1	0
432	1	63	0	0	0	0	0	0	0	0	0	0
433	1	86	0	0	0	1	0	2	0	1	1	0
434	1	69	0	1	0	1	0	1	2	1	9	0
435	0	68	0	1	1	0	0	1	0	1	4	0
436	1	49	1	1	1	0	0	0	0	0	1	0
437	0	67	0	1	1	0	1	0	0	0	1	0
438	0	31	0	0	0	0	0	0	0	0	0	0
439	0	73	0	0	0	0	1	0	0	0	0	0
440	1	46	0	1	0	0	0	0	0	0	1	0
441	1	60	0	0	0	0	0	0	0	0	0	0
442	0	41	0	0	0	0	0	0	0	0	0	0
443	1	41	0	0	0	0	0	0	0	0	0	0
444	1	49	0	1	1	0	0	0	0	0	1	0
445	0	68	0	1	0	0	0	0	0	0	1	0
446	0	66	0	1	0	1	0	0	0	0	1	0
447	1	53	0	1	0	0	0	0	0	0	1	0
448	1	43	0	1	0	0	0	0	0	0	1	0
449	0	68	0	1	1	0	0	0	0	0	1	0
450	0	65	0	1	0	1	0	0	0	0	1	0
451	1	64	1	1	1	1	0	0	0	0	1	0
452	1	54	0	1	0	0	0	0	0	0	1	0
453	1	68	1	1	0	1	0	0	0	0	1	0
454	1	57	0	1	1	1	0	0	0	0	1	0
455	0	71	0	1	0	0	1	0	0	0	1	0
456	1	61	0	0	0	0	0	0	0	0	0	0
457	1	63	0	1	0	0	1	0	0	0	1	0
458	1	64	0	1	1	0	0	0	0	1	2	0
459	1	48	1	1	0	0	0	0	0	0	1	0
460	1	67	0	0	0	0	0	0	0	1	1	0
461	1	57	0	1	0	0	0	0	0	2	3	0
462	0	67	0	1	1	0	0	0	0	0	1	0
463	1	69	0	1	0	1	1	0	0	1	2	0
464	0	65	0	0	0	0	0	0	0	1	1	0
465	1	73	1	1	0	0	1	0	0	2	3	0
466	1	55	0	1	0	1	0	0	1	0	3	0
467	1	73	0	1	0	1	0	0	2	0	6	0
468	0	65	0	1	1	1	1	0	0	2	3	0
469	1	75	0	0	0	0	0	0	0	0	0	0
470	0	65	0	1	1	0	0	1	0	1	4	0
471	0	77	0	1	1	0	1	1	0	1	4	0
472	1	51	0	0	0	0	0	1	0	1	4	0
473	1	71	0	1	0	0	0	1	0	2	5	0
474	0	80	0	1	1	1	1	1	1	2	7	0
475	1	65	1	0	1	0	0	1	0	1	4	0
476	0	66	0	1	0	0	1	2	2	2	12	0
477	1	56	0	1	0	1	1	0	0	0	1	0
478	0	57	0	1	0	0	0	0	0	0	1	0
479	1	74	0	1	0	0	0	0	0	0	1	0
480	1	62	1	1	1	1	1	0	0	0	1	0
481	1	59	0	1	1	0	0	0	0	0	1	0
482	1	54	0	0	0	0	1	0	0	0	0	0
483	1	43	0	1	1	0	0	0	0	0	1	0
484	1	40	1	1	0	0	0	0	0	0	1	0
485	0	56	0	1	0	1	1	0	0	0	1	0
486	1	64	0	1	0	1	1	0	0	1	2	0
487	1	69	0	1	0	0	0	0	1	0	3	0
488	0	71	0	1	0	0	1	0	0	0	1	0
489	1	61	1	1	1	1	0	0	0	0	1	0
490	1	48	0	1	0	1	0	0	0	0	1	0
491	1	55	0	1	1	0	0	0	2	1	7	0
492	1	56	0	0	0	0	0	0	0	2	2	0
493	0	61	0	0	0	0	0	0	2	0	5	0
494	1	61	0	1	0	0	0	0	0	1	2	0
495	0	70	0	1	1	0	0	0	2	0	6	0
496	1	54	0	0	1	0	0	1	2	2	10	0
497	0	66	0	1	0	1	0	0	0	0	1	0
498	1	62	0	1	0	1	0	0	2	1	7	0
499	1	65	0	1	0	1	1	0	0	0	1	0
500	1	56	1	0	0	0	0	0	0	0	0	0
501	0	59	0	1	0	0	1	0	0	0	1	0
502	1	54	0	0	1	0	0	0	0	0	0	0
503	1	51	0	0	0	0	0	0	0	0	0	0
504	1	53	0	1	0	0	0	0	0	0	1	0
505	1	54	0	1	1	0	0	0	0	0	1	0
506	1	55	1	1	0	0	0	0	0	0	1	0
507	0	53	0	1	0	1	0	0	0	1	2	0
508	1	51	0	1	1	1	0	0	0	0	1	0
509	1	55	0	1	1	0	1	0	0	0	1	0
510	1	68	1	1	0	1	1	0	2	0	6	0
511	0	46	0	1	1	1	0	0	0	0	1	0
512	1	81	0	0	0	0	0	0	0	0	0	0
513	1	63	0	1	1	1	0	0	2	2	8	0
514	1	68	0	1	0	1	0	0	1	2	5	0
515	1	74	0	1	0	0	0	0	2	1	7	0
516	1	75	0	1	0	0	0	1	0	0	3	0
517	1	75	1	0	1	0	0	2	0	2	6	0
518	0	52	0	0	0	0	0	0	0	0	0	0
519	0	44	0	1	0	0	0	0	1	0	3	0
520	1	63	0	0	0	0	0	0	0	0	0	0
521	1	65	0	1	0	0	0	0	0	0	1	0
522	1	53	0	0	0	0	0	0	0	1	1	0
523	1	55	0	1	0	0	0	0	0	0	1	0
524	1	56	0	1	1	1	1	0	0	2	3	0
525	1	54	0	0	1	0	0	0	0	2	2	0
526	0	49	0	1	0	1	1	0	0	0	1	0
527	1	81	0	1	0	0	0	0	2	1	7	0
528	1	63	0	1	0	0	0	0	0	0	1	0
529	1	85	0	0	0	0	0	0	0	0	0	0
530	0	52	0	1	0	1	0	0	2	0	6	0
531	1	53	0	1	0	0	0	0	0	1	2	0
532	0	74	0	0	0	0	0	0	1	1	3	0
533	1	57		0	0	0	0	1	0	1	4	0
534	0	61	0	1	0	1	1	1	0	1	4	0
535	1	73	0	0	1	0	0	1	2	2	9	0
536	1	73	0	1	0	0	0	1	1	1	6	0
537	1	51	0	1	0	0	0	0	0	0	1	0
538	1	79	1	1	1	0	0	1	0	1	2	0
539	0	49	0	1	0	0	0	0	2	0	6	0
540	0	68	0	1	1	0	0	0	2	0	6	0
541	1	57	0	0	0	0	0	0	0	1	1	0
542	1	60	0	1	1	0	1	0	2	0	6	0
543	1	66	0	0	1	0	1	0	1	0	2	0
544	0	64	0	1	0	1	0	0	2	0	6	0
545	1	63	0	1	1	0	0	0	0	1	2	0
546	1	73	0	0	0	0	0	0	2	1	6	0
547	1	58	0	1	1	0	0	0	2	1	7	0
548	0	59	0	1	0	0	0	0	0	2	3	0
549	1	57	1	0	1	1	0	0	0	1	1	0
550	1	69	0	0	0	0	0	1	0	1	1	0
551	1	49	0	0	0	0	0	2	0	1	5	0
552	1	64	0	0	1	1	0	2	2	2	11	0
553	0	49	0	1	0	1	1	0	0	0	1	0
554	1	44	0	1	0	0	0	0	0	0	1	0
555	1	36	0	1	0	0	0	0	0	0	1	0
556	0	64	0	1	0	0	0	0	0	0	1	0
557	1	55	0	1	0	0	0	0	2	2	8	0
558	1	73	0	1	0	0	0	0	1	1	4	0
559	1	62	1	0	0	0	0	1	0	0	1	0
560	0	81	0	1	1	1	1	1	1	2	7	0
561	1	69	0	0	0	0	0	1	2	2	9	0
562	1	60	0	1	1	0	0	2	2	2	12	0
563	1	46	0	1	0	0	1	0	0	0	1	0
564	1	56	1	1	0	0	0	0	0	1	2	0
565	1	44	0	1	0	0	0	0	2	1	7	0
566	1	78	0	1	1	0	0	1	1	0	5	0
567	0	59	0	1	0	0	1	1	2	2	10	1
568	1	70	0	1	1	0	1	0	1	1	4	1
569	1	67	0	1	1	0	0	1	0	2	5	1
570	1	69	1	1	1	0	0	0	0	2	3	1
571	1	63	0	1	1	1	0	0	0	0	1	1
572	0	69	0	0	0	0	0	2	0	2	6	1
573	0	70	0	1	1	0	0	0	2	1	7	1
574	1	55	1	1	1	1	0	2	2	2	12	1
575	0	71	0	1	0	0	0	1	1	1	7	1
576	1	68	1	0	0	0	0	1	2	2	9	1
577	1	78	0	1	0	0	0	1	2	1	9	1
578	0	59	0	0	0	0	0	0	0	0	0	1
579	1	62	0	0	0	0	0	0	2	1	6	1
580	0	67	0	1	0	0	0	2	2	0	10	1
581	1	67	0	1	1	1	0	1	2	2	10	1
582	1	63	1	0	0	0	0	0	1	1	3	1
583	1	50	1	1	0	1	0	0	0	0	1	1
584	1	48	1	1	0	0	0	0	0	0	1	1
585	0	66	0	1	1	1	0	0	0	1	2	1
586	0	84	0	0	0	0	0	0	2	0	5	1
587	0	82	0	1	0	1	1	1	2	1	9	1
588	1	76	1	1	0	0	0	1	0	2	5	1
589	1	51	0	1	0	0	0	1	0	2	5	1
590	0	67	0	1	0	1	0	0	0	1	2	1
591	1	77	0	1	1	0	1	1	2	2	10	1
592	0	65	0	1	1	0	0	2	1	1	8	1
593	0	80	0	1	1	0	1	1	1	2	7	1
594	1	74	1	1	1	0	0	0	0	0	1	1
595	1	68	0	0	0	0	0	2	2	2	11	1
596	1	80	1	1	0	0	0	0	2	0	6	1
597	1	65	1	0	0	0	0	1	2	2	8	1
598	0	60	0	1	0	0	0	1	0	1	4	1
599	1	72	1	0	0	0	0	1	1	1	6	1
600	0	66	0	1	1	1	1	0	2	2	8	1
601	1	69	0	0	1	0	0	2	1	2	8	1
602	0	55	0	0	0	0	0	0	0	0	0	1
603	0	46	0	1	0	1	0	0	0	0	1	1
604	1	62	0	1	0	0	0	2	1	1	8	1
605	1	41	0	1	1	1	1	0	2	2	8	1
606	1	76	0	0	0	0	0	1	2	2	9	1
607	0	83	0	1	0	0	0	0	2	0	6	1
608	1	67	0	0	1	1	0	1	2	1	6	1
609	1	56	0	1	0	0	0	0	2	2	8	1
610	1	65	0	1	0	0	0	1	2	2	10	1
611	1	46	1	1	0	1	0	1	2	1	9	1
612	1	64	0	1	1	0	0	0	2	1	9	1
613	1	70	1	1	0	0	0	1	1	0	5	1
614	1	72	0	1	1	0	0	0	1	0	3	1
615	0	77	0	1	0	0	1	2	2	1	11	1
616	1	49	0	1	0	0	0	0	2	0	6	1
617	1	55	1	1	1	1	0	0	2	2	8	1
618	1	68	0	0	0	0	0	1	2	0	7	1
619	1	55	1	0	0	0	0	0	2	2	7	1
620	1	70	0	1	0	0	0	1	2	0	8	1
621	1	65	0	1	1	0	0	1	2	1	9	1
622	1	82	0	1	1	0	0	1	1	2	7	1
623	0	71	0	1	0	0	0	0	2	0	6	1
624	1	63	0	1	0	0	0	2	2	0	10	1
625	1	66	0	1	0	1	0	2	2	1	11	1
626	0	66	0	1	0	0	0	0	0	1	2	1
627	1	64	0	1	0	1	0	0	2	1	7	1
628	1	74	1	1	0	0	0	2	1	2	9	1
629	1	51	0	1	0	0	0	0	2	1	7	1
630	1	56	0	1	0	0	0	2	2	1	11	1
631	1	52	1	1	0	0	0	2	0	0	5	1
632	0	75	0	1	0	0	0	2	2	1	11	1
633	1	49	0	1	1	0	0	2	1	2	9	1
634	0	40	1	1	1	0	0	2	1	1	8	1
635	1	38	0	1	1	0	0	0	0	1	2	1
636	1	79	1	1	0	0	0	2	2	1	11	1
637	0	70	0	1	0	1	0	0	2	1	7	1
638	1	66	0	1	1	0	0	0	2	0	6	1
639	1	57	0	1	0	0	0	0	2	0	6	1
640	0	58	1	1	1	0	0	2	1	0	7	1
641	0	83	0	0	0	0	0	0	2	1	6	1
642	1	69	0	1	1	1	0	1	1	1	7	1
643	1	68	1	1	0	0	0	1	2	2	10	1
644	1	64	1	0	0	0	1	1	2	1	9	1
645	1	68	0	1	0	0	0	0	2	1	8	1
646	1	58	0	0	0	1	0	0	0	1	1	1
647	0	60	1	1	0	0	0	1	2	2	10	1
648	1	60	0	1	1	0	0	2	2	2	12	1
649	1	57	0	1	1	0	0	1	0	2	5	1
650	1	56	0	1	1	0	0	2	2	2	12	1
651	1	65	1	1	1	0	0	0	2	1	7	1
652	1	52	1	1	0	0	0	2	2	0	10	1
653	0	49	1	1	1	0	0	2	2	1	11	1
654	1	73	0	1	1	0	1	2	2	1	11	1
655	1	70	0	1	0	0	0	2	0	1	6	1
656	1	61	0	1	0	0	0	0	0	1	2	1
657	1	69	1	1	1	0	0	2	2	1	11	1
658	0	64	0	1	0	0	0	2	1	0	6	1
659	1	32	0	1	0	0	0	0	0	2	3	1
660	1	48	1	1	1	0	0	0	0	0	1	1
661	1	73	0	1	0	0	0	2	2	1	11	1
662	0	51	1	1	0	0	0	2	0	1	6	1
663	0	71	0	0	0	0	1	2	2	0	9	1
664	0	40	0	0	0	0	0	0	0	0	0	0
665	0	49	0	0	0	0	0	0	0	0	0	0
666	0	60	0	0	0	0	0	0	0	0	0	0
667	0	62	0	0	0	0	0	0	0	0	0	0
668	1	54	0	0	0	0	0	0	0	0	0	0
669	1	65	0	0	0	0	0	0	0	0	0	0
670	1	40	0	0	0	0	0	0	0	0	0	0
671	1	37	0	0	0	0	0	0	0	0	0	0
672	1	52	0	0	0	0	0	0	0	0	0	0
673	1	28	0	0	0	0	0	0	0	0	0	0
674	1	48	0	0	0	0	0	0	0	0	0	0
675	0	33	0	0	0	0	0	0	0	0	0	0
676	0	63	0	0	0	0	0	0	0	0	0	0
677	1	36	0	0	0	0	0	0	0	0	0	0
678	1	54	0	0	0	0	0	0	0	0	0	0
679	1	36	0	0	0	0	0	0	0	0	0	0
680	1	56	0	0	0	0	0	0	0	0	0	0
681	0	30	0	0	0	0	0	0	0	0	0	0
682	1	41	0	0	0	0	0	0	0	0	0	0
683	1	40	0	0	0	0	0	0	0	0	0	0
684	0	51	0	0	0	0	0	0	0	0	0	0
685	1	53	0	0	0	0	0	0	0	0	0	0
686	0	46	0	1	0	0	0	0	0	0	1	0
687	1	50	0	1	0	0	0	0	0	0	1	0
688	0	43	0	1	0	0	0	0	0	0	1	0
689	0	50	0	1	0	0	0	0	0	0	1	0
690	0	53	0	1	0	0	0	0	0	0	1	0
691	1	62	0	1	0	0	0	0	0	0	1	0
692	1	30	0	1	0	0	0	0	0	0	1	0
693	1	63	0	1	0	0	0	0	0	0	1	0
694	1	48	0	1	0	0	0	0	0	0	1	0
695	0	57	0	1	0	0	0	0	0	0	1	0
696	0	61	0	1	0	0	0	0	0	0	1	0
697	0	22	0	1	0	0	0	0	0	0	1	0
698	0	55	0	1	0	0	0	0	0	0	1	0
699	0	67	0	1	0	0	0	0	0	0	1	0
700	1	62	0	1	0	0	0	0	0	0	1	0
701	1	40	0	1	0	0	0	0	0	0	1	0
702	0	66	0	1	0	0	0	0	0	0	1	0
703	0	66	0	1	0	0	0	0	0	0	1	0
704	0	49	0	1	0	0	0	0	0	0	1	0
705	0	63	0	0	0	0	1	0	0	0	0	0
706	0	69	0	0	0	0	1	0	0	0	0	0
707	1	62	0	0	1	0	0	0	0	0	0	0
708	1	57	0	0	1	0	0	0	0	0	0	0
709	0	71	0	0	0	1	0	0	0	0	0	0
710	0	62	0	0	0	1	0	0	0	0	0	0
711	0	58	1	0	0	0	0	0	0	0	0	0
712	1	60	1	0	0	0	0	0	0	0	0	0
713	0	69	1	0	0	0	0	0	0	0	0	0
714	1	60	1	0	0	0	0	0	0	0	0	0
715	1	46	1	1	0	0	0	0	0	0	1	0
716	1	38	1	1	0	0	0	0	0	0	1	0
717	1	61	1	1	0	0	0	0	0	0	1	0
718	1	43	1	1	0	0	0	0	0	0	1	0
719	1	44	1	0	1	0	0	0	0	0	0	0
720	1	65	1	0	1	0	0	0	0	0	0	0
721	1	81	0	1	0	0	1	0	0	0	1	0
722	0	63	0	1	1	0	0	0	0	0	1	0
723	1	62	1	1	1	0	0	0	0	0	1	0
724	1	74	0	1	0	1	1	0	0	0	1	0
725	1	59	1	1	0	0	1	0	0	0	1	0
726	1	62	1	1	0	0	1	0	0	0	1	0
727	1	63	0	0	1	1	0	0	0	0	1	0
728	1	58	1	1	0	0	1	0	1	0	3	0
729	0	67	0	1	0	0	1	0	1	0	3	0
730	1	66	0	0	0	0	0	0	0	0	0	0
731	1	54	0	0	0	0	0	0	0	0	0	0
732	1	63	0	0	0	0	0	0	0	0	0	0
733	0	56	0	0	0	0	0	0	0	0	0	0
734	1	72	0	0	0	0	0	0	0	0	0	0
735	0	62	0	0	0	0	0	0	0	0	0	0
736	1	52	0	0	0	0	0	0	0	0	0	0
737	0	68	0	0	0	0	0	0	0	0	0	0
738	0	58	0	0	0	0	1	0	0	0	0	0
739	1	58	0	0	0	0	1	0	0	0	0	0
740	0	55	0	0	0	0	1	0	0	0	0	0
741	0	46	0	0	0	0	1	0	0	0	0	0
742	1	49	0	1	0	0	0	0	0	0	1	0
743	0	65	0	1	0	0	0	0	0	0	1	0
744	1	40	0	1	0	0	0	0	0	0	1	0
745	1	56	0	1	0	0	0	0	0	0	1	0
746	1	54	0	1	0	0	0	0	0	0	1	0
747	1	61	0	1	0	0	0	0	0	0	1	0
748	0	63	0	1	0	0	1	0	0	0	1	0
749	1	61	0	1	0	0	1	0	0	0	1	0
750	1	67	0	1	0	0	1	0	0	0	1	0
751	1	63	0	0	1	0	0	0	0	0	0	0
752	1	58	0	0	1	0	0	0	0	0	0	0
753	1	62	0	1	1	0	1	0	0	0	1	0
754	1	54	0	1	1	0	1	0	0	0	1	0
755	0	61	0	1	0	0	1	0	0	0	1	0
756	0	57	0	1	0	0	1	0	1	0	3	0
757	0	54	0	1	1	0	0	0	0	0	1	0
758	0	75	0	1	1	0	0	0	0	0	1	0
759	0	75	0	1	1	1	0	0	0	0	1	0
760	0	60	0	0	1	1	1	0	0	0	0	0
761	0	61	0	1	0	0	1	0	0	0	1	0
762	1	61	0	0	0	1	1	0	0	0	0	0
763	1	49	0	1	0	0	0	0	0	0	1	0
764	0	58	0	1	0	1	0	0	0	0	1	0
765	1	63	1	1	0	0	0	0	0	0	1	0
766	0	65	1	1	0	0	0	0	0	0	1	0
767	1	57	1	0	0	0	0	0	0	0	0	0
768	1	29	1	0	1	0	0	0	0	0	0	0
769	1	57	1	0	0	1	0	0	0	0	0	0
770	0	63	1	1	0	0	1	0	0	0	1	0
771	1	47	1	1	0	0	1	0	0	0	1	0
772	1	64	1	1	1	0	0	0	0	0	1	0
773	1	66	1	1	0	0	1	0	0	0	1	0
774	0	66	0	1	1	1	1	0	0	0	1	0
775	1	61	0	0	0	1	0	0	0	0	0	0
776	0	48	0	0	0	0	0	0	0	0	0	0
777	1	61	0	0	0	0	1	1	1	0	4	0
778	0	62	0	1	0	0	1	1	1	0	5	0
779	0	68	0	1	0	0	0	1	2	0	8	0
780	0	56	0	1	0	1	1	0	0	0	1	0
781	0	63	0	1	0	0	0	0	0	0	1	0
782	1	62	0	1	0	0	1	0	0	0	1	0
783	0	66	0	1	0	0	0	1	0	0	1	0
784	0	60	0	1	0	0	1	0	0	0	1	0
785	1	66	0	1	1	0	1	0	0	0	1	0
786	0	64	0	1	1	0	1	1	0	0	1	0
787	1	46	1	0	0	0	0	0	0	0	0	0
788	1	54	1	0	0	0	0	1	0	0	2	0
789	1	62	1	1	0	0	1	0	0	0	1	0
790	1	62	1	1	0	0	1	0	0	0	1	0
791	1	62	1	1	0	0	1	1	0	0	3	0
792	1	68	1	1	0	0	1	1	1	0	5	0
793	1	64	1	1	1	0	0	0	2	0	6	0
794	1	69	1	1	0	1	1	0	2	0	6	0
795	1	56	0	1	0	0	1	0	1	0	3	0
796	1	66	0	1	0	1	1	0	1	0	3	0
797	1	63	0	1	0	0	0	0	1	0	3	0
798	0	58	0	1	1	0	0	0	1	0	3	0
799	1	60	0	0	0	0	0	0	0	1	1	0
800	1	62	0	0	0	0	1	0	0	1	1	0
801	0	47	0	0	0	0	0	0	0	1	1	0
802	1	61	0	1	0	1	0	0	0	1	2	0
803	0	63	0	1	0	0	1	0	0	1	2	0
804	0	64	0	1	0	0	0	0	0	1	2	0
805	0	60	0	1	0	0	1	0	0	1	2	0
806	0	63	0	1	0	0	1	0	0	1	2	0
807	0	62	0	1	1	0	1	0	0	1	2	0
808	0	64	0	1	1	0	1	0	0	1	2	0
809	0	62	0	1	0	0	1	0	0	1	2	0
810	1	62	0	1	0	0	1	0	1	1	4	0
811	0	58	0	1	0	0	0	1	0	1	4	0
812	0	62	0	1	0	0	1	1	1	1	6	0
813	0	52	0	0	0	0	1	1	1	1	5	0
814	0	58	0	0	0	0	0	0	1	1	3	0
815	1	65	1	0	0	0	1	0	0	1	1	0
816	1	48	1	0	0	0	0	0	0	1	1	0
817	1	60	1	0	0	0	1	0	1	1	3	0
818	1	71	1	1	0	0	0	0	0	1	2	0
819	1	61	1	1	1	0	1	0	0	1	2	0
820	1	63	0	0	0	0	1	1	2	2	7	0
821	1	64	0	1	0	0	1	0	0	2	3	0
822	0	72	0	1	1	0	0	1	2	2	10	0
823	1	72	1	0	1	0	1	0	0	2	2	0
824	1	67	1	1	0	0	1	0	0	2	3	0
825	1	64	1	1	0	1	1	0	1	2	5	0
826	1	64	0	0	0	0	0	0	0	0	0	0
827	0	61	0	1	0	0	0	0	0	0	1	0
828	0	63	0	0	1	0	0	0	0	0	0	0
829	1	52	1	1	0	0	0	0	0	0	1	0
830	1	60	1	1	0	0	1	0	0	0	1	0
831	0	62	0	0	0	0	1	0	0	0	0	0
832	1	50	0	1	1	0	0	0	0	0	1	0
833	1	63	1	1	0	0	1	0	0	0	1	0
834	0	57	0	0	0	0	1	0	0	1	1	0
835	1	66	1	0	0	0	1	0	0	1	1	0
836	0	65	0	1	0	1	0	0	0	2	3	0

## Sheet: Internal validation cohort 
	Sex	Age	Drinking	Hypertension	Stroke	Diabetes	Coronary heart disease	Leukoaraiosis	Brain atrophy	Lacune	CPM	>10 CMBs
1	0	56	0	0	0	1	0	0	1	1	3	0
2	1	48	1	1	0	0	0	0	0	1	2	0
3	1	50	0	1	0	0	1	0	0	0	1	0
4	1	69	0	1	1	0	0	0	0	0	1	0
5	1	64	0	0	1	0	0	0	0	0	0	0
6	0	73	0	1	1	0	0	0	0	0	1	0
7	1	50	0	0	1	1	0	1	1	1	5	0
8	0	68	0	1	0	1	0	2	2	2	12	1
9	1	67	0	1	0	1	0	1	2	2	10	1
10	0	56	0	0	0	1	0	0	0	0	0	0
11	1	53	1	1	0	0	0	0	1	1	4	0
12	0	71	0	1	0	0	0	0	0	0	1	0
13	1	74	0	0	0	0	0	0	1	1	3	0
14	1	62	0	1	0	1	0	0	0	0	1	0
15	1	58	1	1	0	1	0	0	1	0	3	0
16	1	72	1	0	1	1	1	0	2	1	6	0
17	0	61	0	0	0	0	0	1	0	0	2	0
18	0	71	0	0	0	0	0	1	1	0	4	0
19	1	64	0	0	0	0	0	0	2	0	5	0
20	1	81	0	1	0	1	1	1	2	0	8	0
21	1	66	0	1	0	0	1	2	2	1	11	1
22	0	65	0	1	0	0	0	0	0	0	1	0
23	0	86	0	0	0	0	1	0	2	0	5	0
24	0	50	0	1	1	0	1	0	0	0	1	0
25	1	66	0	0	0	0	0	0	1	0	2	0
26	1	53	0	1	0	0	0	0	1	0	3	1
27	0	55	0	1	0	0	0	0	0	0	1	0
28	0	72	0	1	1	0	1	0	1	0	3	0
29	0	56	0	1	1	0	0	1	1	1	6	0
30	0	52	0	1	0	0	1	0	0	0	1	0
31	1	49	0	1	1	0	0	0	0	0	1	0
32	1	57	0	1	1	0	0	0	1	0	3	0
33	1	61	1	1	1	0	0	1	2	2	10	1
34	1	59	0	0	1	0	1	0	1	0	2	0
35	1	49	0	0	0	0	0	0	0	0	0	0
36	0	71	0	0	0	0	0	0	0	0	0	0
37	1	60	0	0	0	0	0	0	0	1	1	0
38	0	82	0	1	0	0	0	0	2	0	6	0
39	1	71	0	1	1	1	0	0	2	1	7	0
40	0	67	0	1	0	1	0	1	2	0	8	0
41	1	54	1	1	1	0	0	0	0	1	2	0
42	1	65	0	0	0	0	0	0	0	0	0	0
43	0	72	0	0	0	0	0	0	0	1	1	0
44	1	76	0	0	0	0	0	0	0	0	0	0
45	0	72	0	1	1	1	1	1	2	2	10	1
46	1	77	0	1	1	0	0	2	2	2	12	1
47	1	68	1	0	0	0	0	0	0	0	0	0
48	1	41	0	0	0	0	0	0	1	2	4	0
49	1	75	0	1	0	1	1	1	2	0	8	0
50	1	71	0	1	1	1	1	1	1	2	7	0
51	0	66	0	1	0	0	0	1	0	0	3	0
52	1	75	0	1	0	0	1	0	0	0	1	0
53	0	81	0	0	0	0	0	0	0	0	0	0
54	0	66	0	1	0	0	0	0	0	1	2	0
55	1	67	1	1	0	0	0	0	2	0	6	0
56	1	49	1	1	0	0	0	0	0	0	1	0
57	1	65	1	1	1	0	0	1	0	2	5	0
58	0	63	0	0		0	0	0	0	0	0	0
59	0	50	0	0	0	0	0	0	0	0	0	0
60	0	64	1	1		1	0	1	1	2	7	0
61	0	51	0	1	1	0	0	1	0	1	2	0
62	1	70	0	1	1	0	0	2	2	0	8	1
63	1	70	1	1	0	1	0	0	0	0	1	0
64	0	69	0	0	1	0	0	1	0	0	2	0
65	1	61	0	0	0	0	0	0	1	0	2	0
66	1	60	0	0	0	0	0	0	0	0	0	0
67	0	85	0	1	0	0	1	0	0	1	2	0
68	1	70	1	1	0	0	0	1	0	0	3	0
69	0	54	0	1	0	1	0	1	0	1	4	0
70	1	60	0	1	0	0	0	0	0	0	1	0
71	0	64	0	1	0	1	0	0	0	0	1	0
72	1	63	0	0	0	0	0	0	0	0	0	0
73	1	56	1	1	0	0	0	0	0	1	2	0
74	1	51	1	1	0	0	0	0	0	0	1	0
75	1	53	1	0	0	0	0	1	0	2	4	0
76	1	74	0	1	0	0	1	0	0	0	1	0
77	1	40	0	1	0	0	0	0	0	0	1	0
78	1	72	0	1	0	0	0	1	1	2	7	0
79	1	69	0	1	0	0	0	0	1	1	4	0
80	1	66	1	1	0	1	1	0	2	0	6	0
81	0	70	0	1	1	0	0	1	2	0	8	0
82	0	71	0	1	1	0	0	1	2	1	9	0
83	1	81	0	0	0	0	0	0	0	0	0	0
84	0	69	0	1	0	0	1	1	2	1	9	1
85	1	68	0	1	1	0	1	1	2	2	10	1
86	0	74	0	1	1	0	1	1	1	2	7	1
87	1	70	1	1	0	0	0	1	2	2	10	1
88	1	81	0	1	0	0	0	1	2	2	10	1
89	1	65	0	1	1	0	0	2	2	2	12	1
90	1	60	1	0	0	0	0	1	1	2	6	1
91	1	63	0	1	0	0	0	2	0	0	5	1
92	0	57	0	1	1	0	0	2	2	2	12	1
93	1	42		0	0	1	0	0	0	0	0	1
94	1	65	0	1	1	0	0	1	1	2	7	1
95	0	65	0	1		1	1	1	1	2	7	1
96	1	66	1	0	0	0	0	0	1	1	3	1
97	0	63	0	1	1	0	0	1	1	2	7	1
98	0	45	0	0	0	0	0	1	0	1	3	1
99	1	60	0	0	0	1	1	0	1	1	3	0
100	1	67	1	1		0	0	1	1	0	5	0
101	1	42	0	1	0	0	0	1	1	1	6	0
102	0	60	0	0	0	0	0	0	0	0	0	0
103	0	50	0	1	0	0	1	0	0	0	1	1
104	1	76	0	1		0	0	1	2	2	10	1
105	1	77	0	0	1	0	0	0	0	0	0	0
106	1	57	0	0	0	0	0	0	0	0	0	0
107	1	45	0	1	0	0	0	0	0	0	1	0
108	1	77	1	0	1	0	0	0	0	0	0	0
109	0	57	0	0	0	0	0	0	0	0	0	0
110	1	45	1	1	0	0	0	0	0	0	1	0
111	1	68	0	0	1	0	0	0	0	0	0	0
112	0	63	0	0	0	0	0	0	0	0	0	0
113	1	41	0	1	0	0	0	0	0	0	1	0
114	0	72	0	1	1	0	1	0	0	0	1	0
115	1	68	1	1	1	0	0	0	0	0	1	0
116	0	63	0	1	0	1	0	0	0	0	1	0
117	1	57	1	1	0	0	0	0	0	0	1	0
118	1	70	0	1	0	0	1	0	0	0	1	0
119	1	67	1	0	0	0	0	0	0	0	0	0
120	1	59	0	0	0	0	1	0	0	0	0	0
121	0	62	0	1	0	0	0	0	0	0	1	0
122	1	72	1	0	0	1	0	0	0	0	0	0
123	1	63	0	1	1	1	0	0	0	0	1	0
124	1	66	1	1	1	0	0	0	0	2	3	0
125	1	54	1	1	0	0	0	0	0	0	1	0
126	0	49	0	0	0	0	0	0	0	0	0	0
127	1	42	0	1	0	0	0	0	0	0	1	0
128	1	60	0	0	1	0	0	0	0	0	0	0
129	1	50	0	1	0	0	0	0	0	0	1	0
130	0	56	0	1	0	1	0	0	0	1	2	0
131	0	77	0	1	0	0	0	0	0	0	1	0
132	0	79	0	1	1	0	1	0	0	0	1	0
133	0	68	0	1	1	0	1	0	0	0	1	0
134	1	54	1	0	0	1	1	0	0	0	0	0
135	0	66	0	0	0	0	0	0	0	0	0	0
136	1	76	1	1	0	0	1	0	0	1	2	0
137	1	57	0	1	0	0	0	0	0	1	2	0
138	1	64	0	0	0	0	0	0	1	1	3	0
139	1	70	0	1	0	1	0	0	0	0	1	0
140	0	64	0	1	0	1	1	0	0	0	1	0
141	1	65	1	1	0	0	1	0	0	0	1	0
142	0	60	0	1	0	0	0	0	0	0	1	0
143	1	62	0	0	0	0	0	0	2	0	5	0
144	1	68	0	0	0	0	1	0	2	0	5	0
145	0	86	0	1	0	0	0	2	0	1	1	0
146	0	63	0	1	0	0	0	0	0	0	1	0
147	1	73	0	1	0	0	1	0	1	1	4	0
148	1	48	0	1	1	0	0	0	0	0	1	0
149	1	46	1	1	0	0	0	0	0	0	1	0
150	1	60	1	0	0	0	0	0	0	0	0	0
151	1	49	0	1	1	0	0	0	0	0	1	0
152	0	68	0	1	0	0	0	0	0	0	1	0
153	0	66	0	1	0	1	0	0	0	0	1	0
154	1	53	1	1	0	0	0	0	0	0	1	0
155	0	65	0	1	0	1	0	0	0	0	1	0
156	1	63	0	1	0	0	1	0	0	0	1	0
157	1	69	0	1	0	1	1	0	0	1	2	0
158	0	65	0	0	0	0	0	0	0	1	1	0
159	1	55	0	1	0	1	0	0	1	0	3	0
160	1	73	1	1	0	1	0	0	1	0	3	0
161	0	65	0	1	1	1	1	0	1	2	5	0
162	1	51	0	0	0	0	0	1	0	2	2	0
163	1	71	1	1	0	0	0	1	0	2	3	0
164	0	80	0	1	1	1	1	1	1	2	7	0
165	1	65	1	0	1	0	0	1	1	2	6	1
166	0	57	0	1	0	0	0	0	0	0	1	0
167	1	74	0	1	0	0	0	0	0	0	1	0
168	1	62	1	1	1	1	1	0	0	0	1	0
169	1	59	1	1	1	0	0	0	0	0	1	0
170	1	64	0	1	0	1	1	0	0	1	1	0
171	0	61	0	0	0	0	0	0	1	0	2	0
172	1	61	1	1	0	0	0	0	0	1	2	0
173	0	70	0	1	1	0	0	1	1	0	5	0
174	1	54	0	0	1	0	0	1	1	2	6	1
175	1	51	0	0	0	0	0	0	0	0	0	0
176	1	54	0	1	1	0	0	0	0	0	1	0
177	1	55	0	1	0	0	0	0	0	0	1	0
178	0	53	0	1	0	1	0	0	0	1	2	0
179	1	55	0	1	1	0	1	0	0	0	1	0
180	1	68	0	0	0	1	1	0	1	0	2	0
181	1	68	0	1	0	1	0	0	1	2	5	0
182	1	74	1	1	0	0	0	1	2	1	9	0
183	1	75	0	0	1	0	0	2	0	2	6	0
184	0	52	0	0	0	0	0	0	0	0	0	0
185	0	44	0	1	0	0	0	0	1	0	3	0
186	1	63	1	0	0	0	0	0	0	0	0	0
187	1	65	0	1	0	0	0	0	0	0	1	0
188	1	63	0	1	0	0	0	0	0	0	1	0
189	1	85	1	0	0	0	0	0	0	0	0	0
190	0	52	0	1	0	1	0	0	1	0	3	0
191	0	74	0	0	0	0	0	0	1	1	3	0
192	0	61	0	1	0	1	1	1	0	1	4	0
193	0	49	0	1	0	0	0	0	0	0	1	0
194	0	68	0	1	1	0	0	0	0	0	1	0
195	1	63	0	1	1	0	0	0	0	1	2	0
196	1	58	0	1	1	0	0	0	1	1	4	0
197	0	59	0	1	0	0	0	1	0	2	5	0
198	1	57	0	0	1	1	0	0	0	1	1	0
199	1	69	0	0	0	0	0	1	0	1	3	0
200	1	36	0	1	0	0	0	0	0	0	1	0
201	0	64	0	1	0	0	0	0	0	0	1	0
202	1	73	0	1	0	0	0	0	0	1	2	0
203	1	62	0	0	0	0	0	1	0	0	2	0
204	0	81	0	1	1	1	1	1	1	2	7	1
205	1	46	0	1	0	0	1	0	0	0	1	0
206	1	56	1	1	0	0	0	0	0	1	2	0
207	1	82	0	1	1	0	1	2	1	1	8	1
208	1	57	0	1	0	0	0	1	0	1	4	1
209	0	70	1	1	0	0	0	1	1	2	7	1
210	0	70	0	1	0	0	0	1	1	2	7	1
211	1	78	1	0	1	0	0	2	1	2	8	1
212	1	76	0	1	0	1	0	0	1	0	3	1
213	1	67	0	1	1	0	1	0	1	0	3	1
214	1	61	1	1	0	0	1	0	1	1	4	1
215	1	56	1	1	0	0	0	0	1	1	4	1
216	0	61	0	1	0	0	0	1	1	0	5	1
217	1	48	1	1	1	0	0	0	0	0	1	1
218	1	57	0	1	1	1	0	1	2	1	9	1
219	1	72	0	1	0	0	0	0	2	2	8	1
220	1	51	1	1	0	0	0	1	2	2	10	1
221	0	52	0	1	0	0	0	1	0	2	5	1
222	0	52	0	1	0	0	0	1	2	2	10	1
223	1	66	0	1	0	0	0	2	1	2	9	1
224	0	51	0	1	0	0	0	1	1	2	7	1
225	1	67	0	1	0	0	0	1	1	2	7	1
226	0	53	0	1	0	1	0	0	1	0	3	1
227	1	64	1	1	0	0	0	0	0	1	2	1
228	1	69	0	1	0	0	0	1	2	0	8	1
229	1	67	1	1	0	0	0	2	1	2	9	1
230	1	78	1	1	0	0	0	2	2	2	12	1
231	0	84	0	1	0	1	0	2	1	2	9	1
232	1	68	0	1	1	0	0	0	2	2	8	1
233	1	78	1	1	0	0	0	2	1	2	9	1
234	1	79	1	1	1	0	0	1	2	1	9	1
235	0	56	0	1	0	0	0	1	2	1	9	1
236	0	57	0	1	0	1	0	1	0	2	5	1
237	0	70	0	1	0	0	0	2	1	2	9	1
238	1	57	0	1	0	1	0	2	1	1	8	1
239	1	55	0	1	1	0	0	0	1	2	5	1
240	1	65	0	1	0	1	0	1	2	2	10	1
241	1	56	1	1	1	0	0	1	0	2	5	1
242	1	79	1	1	0	0	0	0	1	0	3	1
243	0	63	0	1	0	0	0	2	1	1	8	1
244	0	58	0	1	1	0	0	0	1	2	5	1
245	1	73	0	1	0	0	0	2	2	1	10	1
246	0	66	0	1	0	0	0	0	0	0	1	1
247	0	63	0	1	0	0	0	0	1	1	4	1
248	1	69	0	1	0	0	0	1	1	2	7	1
249	1	65	1	0	0	0	0	1	0	2	6	1
250	1	55	0	1	0	0	0	1	1	0	5	1
251	0	61	0	1	1	0	0	0	1	0	3	1
252	1	67	0	1	0	1	0	2	1	2	9	1
253	1	57	1	1	1	0	0	1	2	2	10	1
254	1	55	0	1	0	0	0	0	1	0	3	1
255	1	74	1	1	0	1	1	2	0	2	7	1
256	1	72	0	1	0	1	0	1	1	1	6	1
257	1	71	0	1	0	0	1	1	1	2	7	1
258	1	67	1	1	1	0	0	1	1	1	6	1
259	1	55	0	1	0	0	0	0	1	0	3	1
260	1	57	0	1	1	0	0	1	1	2	7	1
261	1	62	1	1	0	0	0	0	0	1	2	1
262	1	77	1	1	0	0	0	0	2	0	6	1
263	0	64	0	1	1	0	1	2	1	2	9	1
264	1	45	0	1	0	0	1	0	1	2	5	1
265	1	64	1	1	1	0	0	2	1	2	9	1
266	1	42	0	1	1	1	0	2	1	1	8	1
267	1	57	1	1	0	0	0	0	0	0	1	1
268	1	75	0	1	0	1	0	2	1	2	9	1
269	0	52	0	0	0	0	0	0	0	0	0	0
270	0	39	0	0	0	0	0	0	0	0	0	0
271	0	55	0	1	0	0	0	0	2	0	6	0
272	1	60	0	0	0	0	0	0	0	1	1	0
273	0	72	0	1	0	0	0	0	0	0	1	0
274	0	56	0	0	1	0	0	0	2	1	6	0
275	1	59	0	0	0	0	1	0	0	0	0	0
276	1	49	1	0	0	0	0	0	0	0	0	0
277	0	85	0	0	0	0	1	0	0	0	0	0
278	0	45	0	1	1	0	0	0	1	0	3	0
279	0	71	0	0	0	0	0	0	0	0	0	0
280	1	60	1	1	0	0	0	0	0	0	1	0
281	1	66	0	1	0	0	0	1	1	1	6	1
282	1	35	0	0	1	1	0	0	1	0	2	0
283	1	75	0	0	0	0	1	0	0	0	0	0
284	1	49	0	1	1	0	0	0	0	0	1	0
285	1	42	0	1	0	0	0	0	2	0	6	0
286	0	60	0	0	0	0	0	0	1	0	2	1
287	1	57	1	1	1	0	0	0	0	0	1	0
288	1	61	0	0	1	0	0	0	2	0	5	0
289	0	82	0	1	0	0	0	0	0	0	1	0
290	1	76	0	1	1	0	0	1	0	2	5	1
291	1	70	1	0	1	0	0	0	2	0	5	0
292	0	54	0	1	1	1	0	0	0	0	1	0
293	1	71	0	1	1	1	0	0	2	0	6	0
294	1	81	0	0	0	0	0	1	0	2	4	1
295	1	60	1	1	1	0	0	1	1	0	5	0
296	0	45	0	1	0	0	0	1	0	2	5	1
297	1	42	0	0	0	1	0	1	1	1	5	1
298	1	65	0	1	1	0	0	1	0	2	5	1
299	0	65	0	1	1	1	1	1	1	1	6	1
300	0	64	0	1	1	1	0	0	0	0	0	0
301	1	53	0	1	0	0	0	0	0	0	1	0
302	1	70	1	1	0	0	0	1	1	2	7	1
303	0	67	0	1	0	1	0	0	0	0	1	0
304	1	54	0	0	1	0	0	0	2	0	5	0
305	1	65	0	0	0	0	0	0	0	0	0	0
306	1	78	1	0	0	0	0	0	0	0	0	0
307	1	63	0	1	1	0	0	0	0	0	1	0
308	1	62	0	0	0	0	0	0	0	0	0	0
309	0	56	0	0	0	0	0	0	0	0	0	0
310	1	49	0	0	0	0	0	0	0	0	0	0
311	0	72	0	0	0	0	0	0	0	0	0	0
312	1	49	0	0	0	0	0	0	0	0	0	0
313	0	56岁	0	0	0	0	0	0	0	0	0	0
314	1	59	0	0	0	0	0	0	0	0	0	0
315	1	60	0	0	0	0	0	0	0	0	0	0
316	1	54	0	0	0	0	0	0	0	0	0	0
317	0	47	0	0	0	0	0	0	0	0	0	0
318	1	54	0	1	0	0	0	0	0	0	1	0
319	1	48	0	1	0	0	0	0	0	0	1	0
320	1	51	0	1	0	0	0	0	0	0	1	0
321	1	75	0	1	0	0	0	0	0	0	1	0
322	1	59	0	1	0	0	0	0	0	0	1	0
323	0	52	0	1	0	0	0	0	0	0	1	0
324	1	59	0	1	0	0	0	0	0	0	1	0
325	0	62	0	1	0	0	0	0	0	0	1	0
326	0	65	0	1	0	0	0	0	0	0	1	0
327	0	43	0	0	1	0	0	0	0	0	0	0
328	1	63	0	0	0	1	0	0	0	0	0	0
329	1	68	0	0	0	0	1	0	0	0	0	0
330	1	47	1	0	0	0	0	0	0	0	0	0
331	0	61	1	0	0	0	0	0	0	0	0	0
332	0	33	1	1	0	0	0	0	0	0	1	0
333	0	54	1	0	1	0	0	0	0	0	0	0
334	0	66	0	1	0	1	0	0	0	0	1	0
335	1	58	0	0	0	1	1	0	0	0	0	0
336	1	47	1	0	0	0	1	0	0	0	0	0
337	1	43	1	1	0	0	1	0	0	0	1	0
338	0	61	0	1	1	1	0	2	0	0	5	0
339	0	61	0	1	0	1	0	0	1	0	3	0
340	1	39	0	0	0	0	0	0	0	0	0	0
341	1	50	0	0	0	0	0	0	0	0	0	0
342	0	61	0	0	0	0	0	0	0	0	0	0
343	0	61	0	0	0	0	0	0	0	0	0	0
344	0	63	0	0	0	1	0	0	0	0	0	0
345	0	62	0	0	0	1	0	0	0	0	0	0
346	0	63	0	1	0	0	0	0	0	0	1	0
347	0	61	0	1	0	0	0	0	0	0	1	0
348	0	60	0	1	0	0	0	0	0	0	1	0
349	0	49	0	0	1	0	0	0	0	0	0	0
350	0	61	0	1	0	1	0	0	0	0	1	0
351	1	53	0	1	0	1	0	0	0	0	1	0
352	0	58	0	1	1	1	0	0	0	0	1	0
353	1	54	0	0	0	0	0	0	0	0	0	0
354	1	49岁	0	1	1	1	0	0	0	0	1	0
355	0	63	0	1	1	1	0	0	0	0	1	0
356	0	52	0	1	0	1	0	0	0	0	1	0
357	1	49	0	1	0	1	1	0	0	0	1	0
358	1	62	0	0	0	1	0	1	0	0	2	0
359	0	68	0	1	1	0	0	0	0	0	1	0
360	0	66	0	1	0	1	1	0	0	0	1	0
361	1	54	1	1	0	0	0	0	0	0	1	0
362	1	64	1	1	0	0	0	0	0	0	1	0
363	1	57	1	0	0	0	0	0	0	0	0	0
364	0	56	1	0	1	0	0	0	0	0	0	0
365	1	53	1	0	0	1	0	0	0	0	0	0
366	1	70	1	1	1	0	0	0	0	0	1	0
367	1	57	1	1	0	0	1	0	0	0	1	0
368	1	68	1	1	0	0	1	0	0	0	1	0
369	1	61	1	1	0	1	0	0	0	0	1	0
370	1	63	1	1	0	1	0	0	0	0	1	0
371	1	60	0	1	1	0	1	0	0	0	1	0
372	1	57	1	0	0	1	0	1	0	0	0	0
373	1	59	0	0	0	1	0	0	0	0	0	0
374	1	64	0	1	0	1	0	1	1	0	5	0
375	1	56	0	1	0	1	0	0	0	0	1	0
376	0	68	0	1	0	0	0	0	0	0	1	0
377	1	60	0	1	0	1	0	1	0	0	3	0
378	0	57	0	1	0	1	0	0	0	0	1	0
379	1	60	1	0	0	0	0	0	0	0	0	0
380	1	53	1	0	0	0	0	1	0	0	2	0
381	1	64	1	1	0	1	0	0	0	0	1	0
382	1	59	1	1	0	1	1	0	0	0	1	0
383	1	67	1	1	0	1	1	1	2	0	8	0
384	1	60	1	1	0	1	0	0	1	0	3	0
385	1	46	0	0	0	0	0	0	0	1	1	0
386	0	53	0	1	0	0	0	0	0	1	2	0
387	1	63	0	1	0	1	0	0	0	1	2	0
388	0	63	0	1	0	1	0	0	0	1	2	0
389	1	70	0	1	0	1	0	0	1	1	4	0
390	1	63	0	1	0	1	0	1	0	1	4	0
391	0	59	0	0	0	1	0	1	1	1	5	0
392	1	59	1	1	0	0	0	0	0	1	2	0
393	1	61	1	1	0	1	0	0	1	1	4	0
394	1	55	0	0	0	1	0	0	1	2	4	0
395	1	62	1	1	0	0	0	0	1	2	5	0
396	1	58	1	1	1	0	0	0	0	2	3	0

## Sheet: external validation cohort
	Sex	Age	Drinking	Hypertension	Stroke	Diabetes	Coronary heart disease	Leukoaraiosis	Brain atrophy	Lacune	CPM	>10 CMBs
1	1	47	1	0	0	0	0	0	0	0	0	0
2	1	49	0	0	0	0	0	0	0	0	0	0
3	0	69	0	1	1	0	1	0	0	0	1	0
4	0	33	0	1	0	0	0	0	0	0	1	0
5	0	57	0	1	0	0	0	0	0	0	1	0
6	1	68	0	0	0	0	0	0	0	0	0	0
7	1	52	0	0	0	0	0	0	0	0	0	0
8	1	67	0	0	0	0	0	0	0	0	0	0
9	1	45	0	1	1	0	1	0	0	1	2	0
10	0	62	0	0	0	0	0	0	0	0	0	0
11	0	81	0	0	0	0	0	0	2	0	5	0
12	0	73	0	1	0	0	1	0	0	0	1	0
13	0	80	0	1	1	0	0	2	2	1	11	1
14	1	70	0	0	0	0	0	0	0	0	0	0
15	1	70	0	0	0	0	0	0	0	0	0	0
16	0	66	0	0	0	0	0	0	0	0	0	0
17	0	74	0	0	1	0	1	0	0	0	0	0
18	1	63	1	1	1	0	0	0	0	0	1	0
19	0	80	1	0	1	0	0	1	0	0	2	0
20	0	76	0	0	0	0	0	1	2	2	9	0
21	0	88	0	0	0	0	0	0	0	0	0	0
22	0	56	0	0	0	0	0	0	0	0	0	0
23	0	57	0	1	0	0	0	0	0	0	1	0
24	0	73	0	0	0	0	0	0	0	0	0	0
25	1	58	0	0	0	0	0	0	0	0	0	0
26	1	72	0	0	0	0	0	0	0	0	0	0
27	1	77	0	0	0	0	0	0	0	0	0	0
28	1	86	1	0	0	0	0	0	0	0	0	0
29	1	63	1	1	0	0	0	0	0	0	1	0
30	1	35	1	1	0	0	0	0	0	0	1	0
31	1	80	0	0	0	0	0	0	0	0	0	0
32	0	54	0	0	0	1	0	0	0	0	0	0
33	1	30	0	0	0	0	0	0	0	0	0	0
34	1	63	0	1	1	0	0	0	0	0	1	0
35	1	64	0	0	0	0	0	0	0	0	0	0
36	1	56	1	1	0	0	0	0	0	0	1	0
37	0	60	0	0	1	0	0	0	0	0	0	0
38	0	75	0	1	0	1	0	0	0	0	1	0
39	1	31	0	0	0	0	0	0	0	1	1	0
40	0	65	0	0	0	0	0	0	0	1	1	0
41	0	57	0	0	0	0	0	2	2	0	9	0
42	0	75	0	1	1	1	0	0	1	1	4	0
43	0	68	0	0	0	0	0	0	1	0	2	0
44	0	82	0	0	0	0	0	0	0	0	0	0
45	1	67	0	0	0	0	0	0	0	0	0	0
46	0	56	0	0	0	0	0	0	0	0	0	0
47	1	70	0	0	0	0	0	0	0	0	0	0
48	1	66	0	0	0	0	0	0	0	0	0	0
49	1	25	0	0	0	0	0	0	0	0	0	0
50	0	35	0	0	0	0	0	0	0	0	0	0
51	0	78	0	0	0	0	0	0	0	0	0	0
52	1	65	0	0	0	0	0	0	0	0	0	0
53	0	63	0	1	1	1	0	1	0	0	3	0
54	1	54	0	1	0	0	0	0	0	0	1	0
55	0	65	0	0	0	0	0	0	0	0	0	0
56	1	55	0	0	0	0	0	0	0	0	0	0
57	0	62	0	1	0	1	0	1	1	1	6	0
58	1	68	1	0	1	0	0	2	1	0	6	0
59	1	51	0	0	0	0	1	0	0	0	0	0
60	0	70	0	1	0	1	1	1	1	1	6	0
61	1	31	0	0	0	0	0	0	0	0	0	0
62	0	28	0	0	0	0	0	0	0	0	0	0
63	1	78	0	1	0	0	0	0	1	0	3	0
64	0	57	0	1	1	0	0	0	0	0	1	0
65	1	58	0	1	1	0	0	0	0	0	1	0
66	1	45	1	1	0	0	0	0	0	1	2	0
67	1	71	0	1	0	0	0	0	2	0	6	0
68	1	47	0	0	1	0	0	0	0	0	0	0
69	0	51	0	1	1	0	0	0	1	0	3	0
70	1	15	0	0	0	0	0	0	0	0	0	0
71	0	39	0	0	0	0	0	0	0	0	0	0
72	1	60	0	0	0	0	0	0	0	0	0	0
73	0	33	0	1	0	0	0	0	0	0	1	0
74	0	37	0	0	0	0	0	0	0	0	0	0
75	0	71	0	1	0	0	0	0	2	1	7	0
76	0	65	0	0	0	0	0	0	0	0	0	0
77	1	63	0	1	1	0	0	0	0	0	1	0
78	1	61	0	1	0	0	0	0	0	0	1	0
79	0	69	0	0	0	0	0	0	0	0	0	0
80	0	67	0	0	0	0	0	0	0	0	0	0
81	1	36	0	0	0	0	0	0	0	0	0	0
82	0	48	0	0	0	0	0	0	0	0	0	0
83	1	82	0	1	0	0	1	0	2	1	7	0
84	0	54	0	1	0	0	0	1	1	2	7	1
85	1	58	1	1	0	0	0	0	0	0	1	0
86	0	59	0	1	0	0	1	1	2	2	10	1
87	1	32	0	1	0	1	0	0	0	0	1	0
88	1	67	0	1	0	0	0	1	2	0	8	1
89	1	60	1	1	0	0	0	1	2	2	10	1
90	1	67	0	0	0	0	0	0	0	0	0	0
91	1	60	1	0	0	0	1	0	0	0	0	0
92	1	65	0	1	0	0	0	1	2	2	10	1
93	1	65	1	0	1	0	0	1	2	2	9	1
94	0	65	0	1	0	1	0	2	2	2	12	1
95	0	73	0	1	0	1	0	0	1	0	3	0
96	0	69	0	1	0	1	1	0	1	0	3	0
97	0	59	0	1	0	0	0	0	0	0	1	0
98	1	76	0	1	0	0	0	1	2	0	8	0
99	1	64	0	1	0	0	0	0	0	0	1	0
100	1	58	1	1	0	1	0	0	0	0	1	0
101	1	55	1	0	0	0	0	1	2	1	8	1
102	0	54	0	1	1	1	1	1	1	2	7	1
103	1	65	0	1	1	1	1	1	2	1	9	1
104	1	72	1	1	0	1	0	2	2	2	12	1
105	1	75	0	1	1	1	1	1	2	2	10	1
106	1	63	1	0	0	1	1	0	0	0	0	0
107	1	69	0	1	1	0	0	1	2	1	9	1
108	1	66	1	1	0	1	1	0	2	2	8	0
109	1	82	0	0	0	0	0	0	2	0	5	0
110	1	56	0	1	0	0	0	0	0	0	1	0
111	0	55	0	0	0	0	0	1	1	1	5	1
112	1	67	0	1	1	0	1	1	2	2	10	1
113	1	58	0	1	0	1	0	0	1	0	3	0
114	1	82	1	1	1	0	1	1	2	2	10	0
115	1	33	0	1	0	0	0	0	0	0	1	0
116	1	74	1	1	0	0	0	1	2	2	10	1
117	0	69	0	1	1	1	1	2	2	2	12	1
118	1	58	0	1	1	0	0	1	2	2	10	1
119	0	82	0	0	1	0	0	1	2	1	8	0
120	0	53	0	0	1	0	0	0	0	0	0	0
121	1	56	0	1	1	0	0	1	1	1	6	0
122	1	64	1	1	0	0	0	0	1	0	3	0
123	1	58	0	0	1	0	0	0	0	0	0	0
124	0	52	0	1	1	0	0	0	0	0	1	0
125	1	60	0	0	1	0	0	0	0	0	0	0
126	1	71	0	1	0	0	0	1	1	0	5	0
127	1	53	0	0	1	1	0	1	1	1	5	0
128	0	80	0	1	1	1	0	1	2	2	10	1
129	0	43	0	0	0	1	0	0	0	0	0	0
130	1	70	1	1	0	0	0	0	1	1	4	0
131	0	62	0	1	1	0	1	2	0	2	9	1
132	1	70	0	1	1	0	1	0	0	2	3	1
133	1	47	0	1	1	0	0	2	2	2	12	1
134	0	48	0	1	1	1	0	2	0	2	7	1
135	0	49	0	0	0	0	0	1	0	1	3	1
136	0	58	0	0	1	1	0	1	1	1	5	0
137	1	54	0	1	1	1	0	1	2	2	10	1
138	1	52	0	0	1	0	0	0	0	0	0	0
139	1	48	0	1	1	0	0	0	0	0	1	0
140	1	62	0	0	0	0	0	0	1	0	2	0
141	0	73	0	1	1	0	1	1	1	2	7	1
142	0	73	0	1	1	0	1	0	1	0	3	0
143	1	74	0	0	0	0	0	0	1	1	3	0
144	1	71	0	1	1	1	0	0	2	1	7	0
145	1	71	0	1	0	0	0	1	1	2	7	0
146	1	64	0	1	1	0	0	1	1	2	7	1
147	1	38	0	1	1	0	0	0	1	0	3	0
148	0	55	0	1	1	0	0	2	2	1	11	1
149	0	36	0	1	0	0	0	0	0	0	1	0
150	1	74	0	1	1	0	1	0	0	0	1	0
151	1	63	0	1	0	1	0	0	1	1	4	0
152	1	59	0	1	0	0	0	0	1	1	4	0
153	0	71	0	1	0	0	0	0	1	1	4	0
154	0	53	0	1	0	0	0	2	0	2	7	0
155	1	68	0	0	0	1	0	0	2	1	6	0
156	0	57	0	1	0	1	0	0	0	0	1	0
157	1	59	1	1	0	0	0	0	0	0	1	0
158	1	64	1	0	0	1	0	0	0	2	2	0
159	0	66	0	1	0	0	1	1	0	0	3	0
160	1	77	0	1	0	0	0	1	1	1	6	0
161	1	60	1	1	1	1	0	1	0	1	4	0
162	0	62	0	1	0	1	0	1	0	0	3	0
163	0	51	0	0	0	1	0	2	0	2	6	0
164	0	51	0	1	0	0	0	0	0	0	1	0
165	0	69	0	1	0	0	0	0	1	1	4	0
166	0	67	0	0	0	0	1	1	1	0	4	0
167	1	67	0	1	0	1	0	1	0	0	3	0
168	0	56	0	1	0	0	0	0	0	0	1	0
169	1	49	0	0	1	0	0	0	0	0	0	0
170	1	67	0	1	1	0	0	0	0	2	3	0
171	0	63	0	1	1	1	0	0	2	1	7	0
172	1	76	0	1	0	0	0	1	1	1	6	0
173	0	73	0	1	1	1	1	1	2	1	8	0
174	0	65	0	1	1	1	0	0	0	0	1	0
175	1	81	0	0	0	0	0	1	1	1	5	0
176	1	63	1	1	0	0	0	0	2	0	6	0
177	1	80	0	1	0	0	0	1	1	1	6	0
178	0	73	0	1	1	0	0	1	0	1	4	0
179	1	81	0	0	1	0	1	0	2	0	5	0
180	0	50	0	0	0	0	0	0	1	0	2	0
181	0	57	0	1	1	0	1	0	0	0	1	0
182	1	87	0	0	0	0	1	0	2	1	6	0
183	1	59	0	0	1	1	0	0	1	1	3	0
184	0	61	0	0	0	0	0	0	0	2	2	0
185	0	61	0	1	0	0	0	1	2	2	10	0
186	1	52	0	1	0	1	0	0	1	0	3	0
187	0	68	0	1	1	0	0	1	2	0	7	0
188	0	75	0	1	0	0	0	1	0	1	4	0
189	1	64	1	0	0	0	0	1	1	2	6	0
190	0	74	0	1	1	0	1	1	2	2	10	0
191	0	66	0	0	0	1	1	0	1	1	3	0
192	1	57	0	1	0	1	0	0	1	1	4	0
193	1	74	0	1	1	0	0	1	2	2	10	0
194	1	63	0	0	0	0	0	0	0	0	0	0
195	1	82	0	1	1	0	0	2	2	2	12	1
196	0	50	0	0	0	0	0	0	0	0	0	0
197	1	61	0	1	1	1	1	0	0	0	1	0
198	0	60	0	1	1	0	0	0	0	0	1	0
199	1	74	0	0	0	0	0	0	0	0	0	0
200	0	58	0	1	1	1	0	0	1	0	3	0
201	1	56	0	1	0	0	0	0	0	0	1	0
202	0	73	0	1	0	0	0	1	0	0	3	0
203	0	64	0	1	0	0	1	0	0	0	1	0
204	0	31	0	0	0	0	0	0	0	0	0	0
205	1	46	0	1	0	0	0	0	0	0	1	0
206	1	64	0	1	0	0	0	0	2	0	6	0
207	1	72	0	0	0	0	0	0	0	0	0	0
208	1	60	0	1	0	1	0	0	0	0	1	0
209	1	56	0	1	1	1	1	1	2	0	7	0
210	1	70	0	1	0	1	0	1	1	0	5	0
211	1	64	0	1	1	1	0	0	2	0	6	0
212	0	69	0	1	1	1	1	0	1	0	3	0
213	1	55	0	1	0	0	0	0	0	0	1	0
214	1	67	0	1	1	0	0	1	0	0	3	0
215	1	56	1	0	0	1	0	1	0	0	2	0
216	0	78	0	1	1	1	0	1	0	0	3	0
217	1	55	1	0	0	0	0	0	1	0	2	0
218	0	71	0	1	0	0	0	0	0	0	1	0
219		64	1	1	0	0	0	0	1	0	3	0
220	0	83	0	1	1	1	1	1	2	0	7	0
221	0	69	0	1	0	1	1	0	0	0	1	0
222	0	75	0	1	0	0	1	1	1	0	5	0
223	0	60	0	1	0	0	0	0	0	0	1	0
224	0	46	0	1	0	0	0	0	0	0	1	0
225	1	62	0	1	1	0	0	1	1	0	5	0
226	0	19	0	0	0	0	0	0	0	0	0	0
227	0	65	0	1	0	1	1	0	1	0	3	0
228	0	71	0	1	1	1	1	0	0	0	1	0
229	1	51	0	1	0	0	0	0	0	0	1	0
230	1	50	0	1	0	1	0	0	0	0	1	0
231	1	57	1	1	0	0	1	0	0	0	1	0
232	1	80	0	1	0	0	0	0	2	1	7	0
233	1	70	0	0	0	0	0	1	1	2	6	0
234	1	66	1	1	0	1	0	0	1	0	3	0
235	1	63	0	1	0	1	1	1	0	0	3	0
236	0	76	0	1	1	1	1	0	1	1	3	0
237	1	74	0	0	0	0	0	0	2	0	5	0
238	1	56	1	1	0	1	0	0	0	0	1	0
239	1	49	0	1	0	1	0	0	0	0	1	0
240	0	58	0	1	0	1	1	0	0	0	1	0
241	1	52	1	1	0	1	0	0	0	0	1	0
242	0	61	0	1	0	1	0	0	1	1	4	0
243	0	61	0	1	0	1	0	0	0	0	1	0
244	0	57	0	1	1	0	0	0	0	0	1	0
245	0	70	0	1	0	1	0	0	0	0	1	0
246	1	64	0	1	1	1	0	1	2	1	9	0
247	1	55	0	0	0	0	0	0	0	0	0	0
248	1	51	0	1	0	0	0	1	1	0	5	0
249	1	83	0	1	0	0	0	1	2	1	9	0
250	1	65	1	0	0	0	0	0	0	0	0	0
251	1	31	0	1	0	0	0	0	0	0	1	0
252	0	56	0	1	1	0	0	0	2	0	6	0
253	1	52	1	1	0	1	0	0	0	0	1	0
254	1	71	0	1	0	1	0	0	2	0	6	0
255	1	38	0	1	0	0	0	0	0	0	1	0
256	1	81	0	0	0	0	0	1	1	1	5	0
257	1	47	0	0	0	1	0	0	0	0	0	0
258	1	67	1	1	0	1	0	0	2	0	6	0
259	1	75	0	1	0	0	0	0	0	0	1	0
260	1	78	0	1	0	1	0	0	2	0	6	0
261	1	69	0	1	0	0	0	0	0	0	1	0
262	1	61	0	1	0	1	0	0	2	0	6	0
263	1	77	0	0	0	0	0	0	0	0	0	0
264	1	58	0	1	0	0	1	0	0	0	1	0
265	0	57	0	1	1	1	0	1	0	0	3	0
266	1	45	0	1	0	0	0	1	1	0	5	0
267	1	62	1	1	0	1	0	0	0	0	1	0
268	1	54	0	0	0	0	0	0	0	0	0	0
269	1	55	1	1	0	1	0	0	0	0	1	0
270	0	70	0	1	0	1	0	1	0	0	1	0
271	0	77	0	1	1	1	0	0	1	1	4	0
272	0	76	0	1	1	1	1	1	1	1	4	0
273	0	62	0	0	0	0	0	0	0	0	0	0
274	0	57	0	1	0	1	0	1	1	0	5	0
275	0	64	0	1	1	0	0	1	0	0	3	0
276	1	62	0	0	1	0	0	0	1	0	3	0
277	0	72	0	0	0	1	0	0	2	0	5	0
278	1	63	0	1	1	0	0	1	1	1	6	0
279	0	56	0	1	1	0	1	0	1	0	3	0
280	0	88	0	1	0	0	0	1	2	0	8	0
281	1	59	0	1	1	0	1	0	1	1	4	0
282	1	70	0	1	1	0	0	0	2	2	8	0
283	1	60	0	0	0	0	0	0	1	0	2	0
284	0	45	0	1	0	0	0	0	1	0	3	0
285	1	59	1	1	0	0	0	0	1	0	3	0
286	1	49	0	0	0	0	0	0	0	0	0	0
287	0	51	0	1	0	0	0	1	0	1	4	0
288	1	66	0	0	1	1	0	0	0	2	2	0
289	1	33	0	1	1	0	0	0	0	0	1	0
290	0	70	0	0	0	0	0	1	0	0	2	0
291	1	71	0	1	0	0	0	1	2	1	9	0
292	1	61	1	1	0	0	1	1	1	1	6	1
293	1	77	0	1	0	0	0	0	0	0	1	1
294	1	63	0	1	1	0	1	1	1	1	6	1
295	1	70	0	0	0	0	0	1	2	2	10	1
296	1	66	0	1	0	0	0	1	1	0	5	1
297	1	52	1	1	1	1	0	2	1	2	9	1
298	1	57	0	1	1	0	1	1	1	2	7	1
299	1	57	1	1	0	0	0	2	2	2	12	1
300	0	57	0	1	0	0	0	1	1	2	7	1
301	0	79	0	1	1	0	0	1	2	2	10	1
302	1	60	0	1	0	0	0	1	0	2	5	1
303	1	68	0	1	1	0	1	1	2	1	9	1
304	1	66	1	1	0	1	0	2	2	2	12	1
305	1	50	0	1	1	0	0	1	1	1	6	1
306	1	77	0	1	1	1	0	2	2	2	12	1
307	1	90	1	1	0	0	0	2	1	1	8	1
308	1	63	0	1	0	0	0	0	1	1	4	1
309	0	55	0	1	0	0	0	2	2	2	12	1
310	0	60	0	1	0	1	0	1	1	2	7	1
311	1	70	0	1	0	0	1	1	2	2	10	1
312	1	56	1	1	0	0	0	2	2	1	11	1
313	1	64	1	1	0	1	0	1	0	2	5	1
314	0	57	0	1	0	1	0	1	2	0	8	1
315	0	57	0	1	0	0	1	0	2	0	6	1
316	0	50	0	0	0	0	0	0	0	0	0	1
317	1	55	1	1	0	0	0	1	1	0	5	1
318	1	59	0	1	1	0	0	2	2	0	10	1
319	1	69	0	1	0	0	0	1	2	0	8	1
320	1	65	0	1	0	0	0	1	1	0	5	1
321	1	84	0	0	0	0	0	2	2	0	9	1
322	0	55	0	1	0	0	1	1	1	0	5	1
323	1	67	1	1	0	0	0	2	1	0	7	1
324	1	66	0	1	0	0	0	2	2	0	10	1
325	0	46	0	1	0	0	0	2	0	0	5	1
326	1	78	0	1	0	0	0	1	2	0	8	1
327	1	82	0	1	0	0	0	1	2	0	8	1
328	1	68	0	1	0	1	0	1	2	2	10	1
329	1	70	0	1	1	0	0	2	2	2	12	1
330	1	57	0	1	0	1	1	1	0	2	5	1
331	0	51	0	1	0	0	0	2	2	2	12	1
332	0	57	0	1	1	0	0	1	2	0	8	1
333	1	56	0	1	1	0	0	2	2	2	12	1
334	1	39	0	1	0	0	0	2	2	2	12	1
335	0	74	0	0	0	0	0	1	2	1	9	1
336	0	67	0	0	0	0	0	1	2	2	10	1
337	1	78	0	1	0	0	0	2	2	1	11	1
338	1	62	0	1	0	1	0	1	2	2	10	1
339	1	41	0	1	1	0	1	2	2	2	12	1
340	1	81	0	1	0	0	0	2	2	1	11	1
341	1	46	1	1	1	0	0	2	2	2	12	1
342	1	71	0	1	0	0	1	0	2	2	8	1
343	1	60	0	1	1	0	0	0	2	1	7	1
344	1	73	0	1	1	0	0	1	2	2	10	1
345	1	90	1	1	0	0	0	2	2	2	12	1
346	1	72	0	0	1	1	0	2	2	2	12	1
347	0	56	0	1	0	0	0	2	1	2	9	1
348	1	58	1	1	1	0	0	2	2	2	12	1
349	1	57	1	1	1	0	0	1	2	1	9	1
350	1	63	0	1	0	0	0	2	2	2	12	1
351	1	52	0	1	0	0	0	1	2	2	10	1
352	1	51	0	1	0	0	0	2	2	2	12	1
353	1	58	0	0	0	0	0	1	2	2	10	1
354	1	57	0	1	1	0	0	2	2	0	10	1
355	0	71	0	1	0	0	0	2	2	0	10	1
356	1	53	0	1	0	0	0	0	0	0	1	1
357	1	67	0	1	0	0	0	1	2	0	8	1
358	1	37	1	1	1	0	0	2	2	2	12	1
359	0	57	0	0	0	1	0	2	2	0	9	1
360	1	18	0	0	0	0	0	0	0	1	1	1
361	1	62	1	0	0	1	1	1	1	0	4	1
362	1	63	1	0	0	1	0	1	2	1	9	1
363	0	50	0	1	0	0	0	1	1	2	7	1
364	1	59	0	1	0	0	0	1	1	2	7	1
365	0	65	0	1	0	0	1	2	2	2	12	1
366	1	50	0	1	0	0	0	1	0	2	5	1
367	1	63	0	1	0	0	0	2	2	2	12	1
368	1	69	0	1	0	1	1	1	2	2	10	1
369	0	61	0	1	1	0	0	0	0	0	1	1
370	1	55	1	1	0	0	0	0	1	1	4	1
371	1	65	0	1	1	0	0	2	2	2	12	1
372	0	64	0	1	0	0	1	0	0	0	1	1
373	0	76	0	1	0	0	0	0	0	0	1	1
374	1	56	1	0	1	0	0	1	1	1	5	1
375	0	75	0	1	1	0	1	2	2	2	12	1
376	1	54	0	1	1	1	1	0	0	0	1	0
377	1	49	0	1	0	0	0	0	0	0	1	0
378	0	49	0	0	1	0	0	0	0	0	0	0
379	0	65	0	1	0	0	0	0	0	0	1	0
380	1	53	0	1	0	1	0	0	0	0	1	0
381	1	40	0	1	0	0	0	0	0	0	1	0
382	1	72	0	0	0	0	0	0	0	0	0	0
383	1	58	0	0	0	1	0	0	0	0	0	0
384	1	29	1	0	1	0	0	0	0	0	0	0
385	1	56	1	1	0	0	0	0	0	0	1	0
386	1	63	1	1	0	0	0	0	0	0	1	0
387	1	70	1	1	1	0	0	0	0	0	1	0
388	0	55	0	0	0	1	0	0	0	0	0	0
389	1	66	0	0	0	0	0	0	0	0	0	0
390	1	54	0	0	0	0	1	0	0	0	0	0
391	1	52	0	0	0	0	0	0	0	0	0	0
392	1	53	1	0	0	1	0	0	0	0	0	0
393	0	56	1	0	1	0	0	0	0	0	0	0
394	0	68	0	0	0	0	0	0	0	0	0	0
395	1	39	0	0	0	0	1	0	0	0	0	0
396	1	57	1	0	0	0	0	0	0	0	0	0
397	0	65	1	1	0	0	0	0	0	0	1	0
398	0	54	0	1	1	0	0	0	0	0	1	0
399	1	50	0	0	0	0	0	0	0	0	0	0
400	0	58	0	1	0	0	0	1	0	1	4	0
401	1	64	0	1	0	1	0	1	1	0	5	0
402	1	68	1	1	0	1	0	1	1	0	5	0
403	1	41	0	1	0	1	0	0	0	0	1	0
404	0	72	0	1	1	1	0	0	0	0	1	0
405	1	68	1	1	1	0	0	0	0	0	1	0
406	0	63	0	1	0	0	1	0	0	0	1	0
407	1	57	1	1	0	0	0	0	0	0	1	0
408	1	70	0	1	0	1	0	0	0	0	1	0
409	1	67	1	0	0	0	0	0	0	0	0	0
410	1	76	1	1	1	0	1	0	0	1	2	0
411	1	57	0	1	0	0	0	0	0	1	2	0
412	1	64	0	0	0	0	0	0	1	1	3	0
413	1	70	0	1	0	0	1	0	0	0	1	0
414	0	64	0	1	0	1	1	0	0	0	1	0
415	1	65	1	1	0	1	0	1	0	0	1	0
416	0	60	0	1	0	0	0	0	0	0	1	0
417	0	51	0	0	0	0	0	1	1	2	6	1
418	1	67	0	1	0	0	0	1	1	2	7	1
419	1	74	1	1	1	1	1	2	0	2	7	1
420	1	72	0	1	0	0	0	1	1	1	6	1
421	1	71	0	1	0	1	0	1	1	2	7	1
